# Supplementary material
Source: publisher figshare collection journal article supplement (https://gsapubs.figshare.com/articles/dataset/_/12529460)
Supplement: Supplementary file 1 [file 1]

## APPENDIX 1

As described by Gehrels et al. (2008), analyses reported in this study involve ablation of zircon with a DUV193 Excimer laser system from New Wave Instruments (operating at a wavelength of 193 nm) using a spot diameter of 35 microns. The ablated material is carried in helium gas into the plasma source of a GVI Isoprobe, equipped with nine moveable Faraday collectors and four low-side Channeltrons (ion counters). Each analysis consists of an integration on peaks with the laser off (for backgrounds), 20 one-second integrations with the laser firing, and a 30 second delay to purge the previous sample and prepare for the next analysis. The ablation pit is ~15 microns in depth and ion yields are ~1.0 mv per ppm.

Common Pb is corrected by assuming an initial Pb composition from Stacey and Kramers (1975) and using measured  $^{204}\text{Pb}$ . Conservative uncertainties of 1.0 for  $^{206}\text{Pb}/^{204}\text{Pb}$ , 0.3 for  $^{207}\text{Pb}/^{204}\text{Pb}$ , and 2.0 for  $^{208}\text{Pb}/^{204}\text{Pb}$  are used for the composition of the common Pb.

Fractionation of Pb/U and Pb/Th occurs primarily in the laser pit, and is highly sensitive to the rate of carrier gas flow across the sample surface. A carrier gas flow rate of 0.45 ml/minute generates an optimal balance between signal intensity (Pb/U sensitivity of 0.9) and stability. Inter-element fractionation of Pb/U is generally ~20%, whereas apparent fractionation of Pb isotopes is generally ~2%. For every five analyses of unknowns, an analysis of fragments of a large Sri Lanka zircon crystal with known age of  $563.5 \pm 3.2$  Ma (2-sigma error, ID-TIMS by Gehrels et al., 2008) is used to correct for this fractionation. The uncertainty resulting from the calibration correction is generally ~1% (2-sigma) for both  $^{206}\text{Pb}/^{207}\text{Pb}$  and  $^{206}\text{Pb}/^{238}\text{U}$  ages.

Pb/U and Pb/Th fractionation varies depending on depth of laser ablation. In most cases, Pb/U and Th/Pb increase by ~5% during an analysis that takes 20 seconds and excavates to a depth of 15 microns. This is accounted for by applying a depth-related fractionation factor to the

unknowns. Due to variations in the flow rate and pattern of movement of the helium carrier gas across the sample surface, Pb/U fractionation varies depending on position on the mount surface. Mounting all standards and unknowns close together in the central part of the mount and analyzing only standards that are as close as possible to each unknown reduces the analytical error.

Intensities with our Sri Lanka standard, which have known U, Th, and Pb concentrations, are compared with unknowns in order to determine accurate concentrations of U and Th (to ~20%). Measurement errors for determination of  $^{206}\text{Pb}/^{238}\text{U}$  and  $^{206}\text{Pb}/^{204}\text{Pb}$  yield uncertainties of ~1-2% (at 2-sigma level) in the  $^{206}\text{Pb}/^{238}\text{U}$  age. Measurement errors for determination of  $^{206}\text{Pb}/^{207}\text{Pb}$  and  $^{206}\text{Pb}/^{204}\text{Pb}$  also result in ~1-2% (at 2-sigma level) uncertainty in age for grains that are >1.0 Ga.

Grains were selected for analysis at random from the population of grains available. Complexities in the grains were identified by careful analysis of  $^{206}\text{Pb}/^{238}\text{U}$  during data acquisition of both standards and unknowns. In nearly all cases, standards yield  $^{206}\text{Pb}/^{238}\text{U}$  that increases in linear fashion during an analysis because the material analyzed is uniform in age and free from inclusions and fractures. Most unknowns exhibit a similar down-hole increase in  $^{206}\text{Pb}/^{238}\text{U}$ , and are accordingly interpreted to be free from age zonation, inclusions, and fractures. Some unknowns, however, yield  $^{206}\text{Pb}/^{238}\text{U}$  patterns with different slopes, non-linear segments, or jumps in value. Such analyses are rejected during acquisition, and not considered further. We accordingly have confidence that most of the accepted analyses are not compromised by ablation across age boundaries, fractures, inclusions, or domains with variable Pb loss.

The analytical data are reported in Table DR1. All analyses are included from each sample, except those with unacceptably high (>500 cps) levels of  $^{204}\text{Pb}$ . Uncertainties shown in these tables are at the 1-sigma level, and include only measurement errors. These errors arise from the measurement of  $^{206}\text{Pb}/^{238}\text{U}$ ,  $^{206}\text{Pb}/^{207}\text{Pb}$ , and  $^{206}\text{Pb}/^{204}\text{Pb}$  and are referred to as random (or measurement) errors because they are different for each analysis within a session.

Interpreted ages are based on  $^{206}\text{Pb}/^{238}\text{U}$  for grains <1.0 Ga and on  $^{206}\text{Pb}/^{207}\text{Pb}$  for grains >1.0 Ga. This division at 1.0 Ga is a result of the increasing uncertainty of  $^{206}\text{Pb}/^{238}\text{U}$  ages and the decreasing uncertainty of  $^{206}\text{Pb}/^{207}\text{Pb}$  ages as a function of age.

Data are filtered as follows:

- (1) Analyses with  $^{206}\text{Pb}/^{238}\text{U}$  ages younger than 1.0 Ga are rejected if 1-sigma uncertainty is greater than 10%.
- (2) Analyses with  $^{206}\text{Pb}/^{207}\text{Pb}$  ages older than 1.0 Ga are rejected if 1-sigma uncertainty is greater than 10%.
- (3) Analyses with  $^{206}\text{Pb}/^{238}\text{U}$  ages older than 600 Ma are rejected if discordance (based on comparison of  $^{206}\text{Pb}/^{238}\text{U}$  versus  $^{206}\text{Pb}/^{207}\text{Pb}$  ages) is greater than 10%. This 600 Ma cutoff is used because  $^{206}\text{Pb}/^{207}\text{Pb}$  ages are difficult to measure reliably for young grains.
- (4) Analyses with  $^{206}\text{Pb}/^{238}\text{U}$  ages older than 600 Ma are rejected if reverse discordance (based on comparison of  $^{206}\text{Pb}/^{238}\text{U}$  versus  $^{206}\text{Pb}/^{207}\text{Pb}$  ages) is greater than 5%. This 600 Ma cutoff is used because  $^{206}\text{Pb}/^{207}\text{Pb}$  ages are difficult to measure reliably for young grains.

One of the complexities of the data set is the presence of several ages that are younger than the depositional age of the Lower Devonian samples. The data from each of these samples is described separately below.

For sample TSA138, the minimum depositional age is  $407 \pm 2.8$  Ma based on the Lochovian-Pragian biostratigraphic age (Wang et al., 2005) and the time scale of Ogg et al. (2008). Two analyses yield  $^{206}\text{Pb}/^{238}\text{U}$  ages younger than  $407 \pm 2.8$  Ma but overlap within analytical uncertainty, and a third is considerably younger ( $384.5 \pm 7.6$  Ma at 1-sigma). These analyses are interpreted to have experienced slight amounts of Pb loss, or to have been compromised by intersection of a fracture or inclusion during laser ablation. The youngest probability peak from this sample has an age of 406 Ma (Table DR1), which is consistent with the biostratigraphic age within uncertainty.

For sample Ch4D1, the minimum depositional age is  $391.8 \pm 0.4$  Ma based on the Emsian biostratigraphic age and the age of the Emsian-Eifellian boundary from Kaufmann et al. (2005). Only one analysis yields  $^{206}\text{Pb}/^{238}\text{U}$  age younger than this, but overlaps within uncertainty ( $390.1 \pm 12.8$  Ma at 1-sigma). The youngest probability peak from this sample is 411 Ma, which considerably predates the minimum depositional age.

For sample Ch4D2, the minimum depositional age is  $391.8 \pm 0.4$  Ma based on the Emsian biostratigraphic age and the age of the Emsian–Eifellian boundary from Kaufmann et al. (2005). This sample yields quite a few analyses with  $^{206}\text{Pb}/^{238}\text{U}$  ages younger than this, but almost all are characterized by large analytical uncertainty. Accordingly, only one analysis is younger than the depositional age within 2-sigma uncertainty. The young age and large uncertainty of these analyses suggests that they may have experienced slight to moderate amounts of Pb loss, and/or that some analyses are compromised by intersection of a fracture or inclusion during laser ablation. The youngest probability peak from this sample is 409 Ma, which considerably predates the minimum depositional age.

The accuracy of our analyses is monitored by analysis of R33, which is mounted together with every set of unknowns. R33 yields an ID-TIMS age of  $419.26 \pm 0.39$  Ma. Five analyses were conducted from each mount, with weighted mean ages of  $416.7 \pm 8.9$  Ma,  $416.7 \pm 5.2$  Ma,  $422.9 \pm 5.6$  Ma,  $419.4 \pm 5.0$ , and  $419.1 \pm 4.9$  Ma (DR Table 1). The uncertainty of an individual R33 analysis averaged 5.9 Ma. Together these analyses indicate that individual analyses conducted during this study are in most cases accurate to 2%, which is typical of LA-ICPMS geochronology (e.g., Gehrels et al., 2008).

#### References Cited

Black, L., Kamo, S., Allen, C., Davis, D., Aleinikoff, J., Valley, J., Mundil, R., Campbell, I., Korsch, R., Williams, I., and Foudoulis, C., 2004, Improved  $^{206}\text{Pb}/^{238}\text{U}$  microprobe geochronology by the monitoring of a trace-element-related matrix effect; SHRIMP, ID-TIMS, ELA-ICP-MS, and oxygen isotope documentation for a series of zircon standards: *Chemical Geology*, v. 205, p. 115-140.

Gehrels, G.E., Valencia, V., Ruiz, J., 2008, Enhanced precision, accuracy, efficiency, and spatial resolution of U-Pb ages by laser ablation-multicollector-inductively coupled plasma-mass spectrometry: *Geochemistry, Geophysics, Geosystems*, v. 9, Q03017, doi:10.1029/2007GC001805.

Kaufman, B., Trapp, E., Mezger, K., and Weddige, K., 2005, Two new Emsian (Early Devonian) U- Pb zircon ages from volcanic rocks of the Rhenish Massif (Germany): implications for the Devonian time scale: *Journal of the Geological Society, London*, v. 162, p. 363-371.

Stacey, J.S., and Kramers, J.D., 1975, Approximation of terrestrial lead isotope evolution by a two stage model: *Earth and Planetary Science Letters*, v. 26, p. 207-221.

Wang, C., Weddige K., and Minjin C., 2005, Age revision of some Paleozoic strata of Mongolia based on conodonts: *Journal of Asian Earth Sciences*, v. 25, p. 759-71.

| DR Table 1. U-Pb geochronologic analyses and plots. |       |       |      |        |     |        |                |        |     |       |        |      |                    |      |        |      |          |      |      |
|-----------------------------------------------------|-------|-------|------|--------|-----|--------|----------------|--------|-----|-------|--------|------|--------------------|------|--------|------|----------|------|------|
|                                                     |       |       |      |        |     |        | Isotope ratios |        |     |       |        |      | Apparent ages (Ma) |      |        |      |          |      |      |
|                                                     |       |       |      |        |     |        |                |        |     |       |        |      |                    |      |        |      |          |      |      |
| Analysis                                            | U     | 206Pb | U/Th | 206Pb* | ±   | 207Pb* | ±              | 206Pb* | ±   | error | 206Pb* | ±    | 207Pb*             | ±    | 206Pb* | ±    | Best age | ±    | Conc |
|                                                     | (ppm) | 204Pb |      | 207Pb* | (%) | 235U*  | (%)            | 238U   | (%) | corr. | 238U*  | (Ma) | 235U               | (Ma) | 207Pb* | (Ma) | (Ma)     | (Ma) | %    |
|                                                     |       |       |      |        |     |        |                |        |     |       |        |      |                    |      |        |      |          |      |      |

|              |      |       |     |         |      |        |      |        |     |      |       |      |       |      |        |       |       |      |      |
|--------------|------|-------|-----|---------|------|--------|------|--------|-----|------|-------|------|-------|------|--------|-------|-------|------|------|
| SJS6-106-90  | 219  | 7606  | 1.0 | 16.6756 | 6.2  | 0.6101 | 7.6  | 0.0738 | 4.3 | 0.57 | 458.9 | 19.0 | 483.6 | 29.1 | 602.4  | 135.3 | 458.9 | 19.0 | 76   |
| SJS6-106-48  | 439  | 18086 | 1.0 | 17.4890 | 2.6  | 0.5855 | 3.3  | 0.0743 | 2.0 | 0.61 | 461.8 | 9.0  | 468.0 | 12.4 | 498.4  | 57.9  | 461.8 | 9.0  | 93   |
| SJS6-106-37  | 150  | 18151 | 1.9 | 18.2426 | 2.6  | 0.5642 | 2.9  | 0.0746 | 1.2 | 0.42 | 464.1 | 5.5  | 454.2 | 10.6 | 404.7  | 59.1  | 464.1 | 5.5  | 115  |
| SJS6-106-15  | 41   | 3865  | 1.9 | 25.0234 | 28.8 | 0.4200 | 29.0 | 0.0762 | 3.5 | 0.12 | 473.6 | 16.2 | 356.1 | 87.3 | -353.3 | 756.2 | 473.6 | 16.2 | -134 |
| SJS6-106-32  | 83   | 15368 | 1.3 | 16.9361 | 7.5  | 0.6227 | 7.8  | 0.0765 | 1.9 | 0.24 | 475.1 | 8.5  | 491.5 | 30.3 | 568.8  | 164.3 | 475.1 | 8.5  | 84   |
| SJS6-106-31  | 306  | 24659 | 2.2 | 17.3602 | 2.2  | 0.6106 | 3.9  | 0.0769 | 3.2 | 0.82 | 477.5 | 14.9 | 483.9 | 15.1 | 514.7  | 49.0  | 477.5 | 14.9 | 93   |
| SJS6-106-40  | 298  | 10240 | 1.2 | 16.2189 | 7.4  | 0.6556 | 7.6  | 0.0771 | 1.4 | 0.18 | 478.9 | 6.3  | 511.9 | 30.4 | 662.2  | 159.4 | 478.9 | 6.3  | 72   |
| SJS6-106-33  | 728  | 18966 | 3.4 | 17.3685 | 2.1  | 0.6183 | 2.8  | 0.0779 | 1.9 | 0.66 | 483.5 | 8.7  | 488.8 | 10.9 | 513.6  | 46.2  | 483.5 | 8.7  | 94   |
| SJS6-106-63  | 111  | 21455 | 2.0 | 17.4267 | 4.5  | 0.6165 | 4.8  | 0.0779 | 1.7 | 0.36 | 483.7 | 8.1  | 487.7 | 18.8 | 506.3  | 99.6  | 483.7 | 8.1  | 96   |
| SJS6-106-81  | 264  | 33152 | 2.4 | 17.3232 | 2.4  | 0.6244 | 2.4  | 0.0785 | 0.5 | 0.22 | 486.9 | 2.5  | 492.6 | 9.5  | 519.4  | 52.2  | 486.9 | 2.5  | 94   |
| SJS6-106-88  | 188  | 17207 | 1.2 | 17.3617 | 3.3  | 0.6234 | 5.7  | 0.0785 | 4.6 | 0.82 | 487.1 | 21.8 | 492.0 | 22.2 | 514.5  | 72.4  | 487.1 | 21.8 | 95   |
| SJS6-106-4   | 131  | 15740 | 2.3 | 17.0317 | 5.2  | 0.6370 | 5.5  | 0.0787 | 1.9 | 0.35 | 488.3 | 9.1  | 500.4 | 21.8 | 556.5  | 113.0 | 488.3 | 9.1  | 88   |
| SJS6-106-26  | 294  | 33129 | 2.0 | 17.4459 | 3.3  | 0.6227 | 4.4  | 0.0788 | 2.9 | 0.66 | 488.9 | 13.8 | 491.5 | 17.3 | 503.9  | 73.7  | 488.9 | 13.8 | 97   |
| SJS6-106-38  | 289  | 39943 | 0.9 | 17.4648 | 2.4  | 0.6228 | 2.7  | 0.0789 | 1.1 | 0.42 | 489.5 | 5.3  | 491.6 | 10.5 | 501.5  | 53.7  | 489.5 | 5.3  | 98   |
| SJS6-106-7   | 207  | 35503 | 2.5 | 17.4837 | 2.3  | 0.6229 | 4.0  | 0.0790 | 3.2 | 0.81 | 490.1 | 15.1 | 491.7 | 15.4 | 499.1  | 51.7  | 490.1 | 15.1 | 98   |
| SJS6-106-20  | 235  | 5599  | 1.6 | 17.1655 | 3.4  | 0.6348 | 3.8  | 0.0790 | 1.6 | 0.43 | 490.3 | 7.7  | 499.1 | 14.9 | 539.4  | 74.8  | 490.3 | 7.7  | 91   |
| SJS6-106-46  | 81   | 13906 | 1.2 | 19.2684 | 10.8 | 0.5689 | 10.9 | 0.0795 | 1.4 | 0.13 | 493.1 | 6.7  | 457.3 | 40.0 | 281.0  | 246.8 | 493.1 | 6.7  | 176  |
| SJS6-106-12  | 57   | 6947  | 1.1 | 18.6126 | 12.2 | 0.5891 | 12.2 | 0.0795 | 0.7 | 0.06 | 493.3 | 3.6  | 470.3 | 45.9 | 359.6  | 275.5 | 493.3 | 3.6  | 137  |
| SJS6-106-44  | 166  | 26833 | 1.3 | 17.1733 | 3.2  | 0.6392 | 4.0  | 0.0796 | 2.5 | 0.62 | 493.8 | 11.8 | 501.8 | 15.9 | 538.4  | 69.4  | 493.8 | 11.8 | 92   |
| SJS6-106-83  | 274  | 29528 | 1.7 | 17.6020 | 3.3  | 0.6248 | 3.6  | 0.0798 | 1.5 | 0.43 | 494.7 | 7.3  | 492.9 | 14.1 | 484.3  | 71.9  | 494.7 | 7.3  | 102  |
| SJS6-106-54  | 115  | 12543 | 1.9 | 17.9191 | 5.2  | 0.6143 | 5.4  | 0.0798 | 1.6 | 0.29 | 495.2 | 7.4  | 486.3 | 20.8 | 444.6  | 114.6 | 495.2 | 7.4  | 111  |
| SJS6-106-92  | 424  | 35396 | 1.8 | 17.2532 | 1.4  | 0.6389 | 2.4  | 0.0800 | 1.9 | 0.80 | 495.8 | 9.0  | 501.6 | 9.4  | 528.3  | 31.1  | 495.8 | 9.0  | 94   |
| SJS6-106-34  | 344  | 73145 | 1.8 | 17.5079 | 2.3  | 0.6300 | 2.8  | 0.0800 | 1.6 | 0.56 | 496.1 | 7.4  | 496.1 | 10.9 | 496.0  | 50.7  | 496.1 | 7.4  | 100  |
| SJS6-106-22  | 157  | 20744 | 2.3 | 17.7939 | 4.6  | 0.6199 | 4.9  | 0.0800 | 1.7 | 0.36 | 496.1 | 8.3  | 489.8 | 19.0 | 460.2  | 101.4 | 496.1 | 8.3  | 108  |
| SJS6-106-71  | 94   | 10115 | 1.6 | 17.1431 | 7.8  | 0.6441 | 8.1  | 0.0801 | 2.2 | 0.27 | 496.6 | 10.5 | 504.8 | 32.2 | 542.3  | 170.7 | 496.6 | 10.5 | 92   |
| SJS6-106-14  | 241  | 31803 | 1.3 | 17.3605 | 1.4  | 0.6362 | 2.1  | 0.0801 | 1.5 | 0.73 | 496.7 | 7.2  | 500.0 | 8.1  | 514.6  | 30.6  | 496.7 | 7.2  | 97   |
| SJS6-106-30  | 225  | 26255 | 2.6 | 16.9523 | 3.5  | 0.6538 | 4.1  | 0.0804 | 2.2 | 0.54 | 498.4 | 10.5 | 510.8 | 16.5 | 566.7  | 75.4  | 498.4 | 10.5 | 88   |
| SJS6-106-9   | 482  | 71746 | 5.9 | 17.2555 | 2.4  | 0.6434 | 3.3  | 0.0805 | 2.4 | 0.70 | 499.3 | 11.3 | 504.4 | 13.3 | 528.0  | 52.1  | 499.3 | 11.3 | 95   |
| SJS6-106-42  | 105  | 12645 | 1.0 | 18.7875 | 9.5  | 0.5921 | 9.5  | 0.0807 | 0.9 | 0.09 | 500.2 | 4.2  | 472.2 | 36.1 | 338.5  | 215.7 | 500.2 | 4.2  | 148  |
| SJS6-106-77  | 294  | 6416  | 1.3 | 16.5124 | 8.7  | 0.6768 | 8.8  | 0.0810 | 1.5 | 0.17 | 502.4 | 7.1  | 524.8 | 36.2 | 623.6  | 188.0 | 502.4 | 7.1  | 81   |
| SJS6-106-59  | 424  | 43710 | 1.2 | 17.3907 | 1.9  | 0.6452 | 2.3  | 0.0814 | 1.4 | 0.60 | 504.4 | 6.7  | 505.5 | 9.2  | 510.8  | 41.0  | 504.4 | 6.7  | 99   |
| SJS6-106-100 | 249  | 28190 | 1.3 | 16.9854 | 2.5  | 0.6618 | 3.4  | 0.0815 | 2.3 | 0.68 | 505.2 | 11.1 | 515.7 | 13.6 | 562.4  | 54.0  | 505.2 | 11.1 | 90   |
| SJS6-106-76  | 605  | 48609 | 2.4 | 17.4676 | 0.8  | 0.6439 | 1.2  | 0.0816 | 0.9 | 0.73 | 505.5 | 4.4  | 504.7 | 4.9  | 501.2  | 18.7  | 505.5 | 4.4  | 101  |
| SJS6-106-54  | 247  | 26888 | 1.2 | 17.3451 | 2.7  | 0.6491 | 2.8  | 0.0817 | 0.7 | 0.26 | 506.0 | 3.5  | 507.9 | 11.0 | 516.6  | 58.6  | 506.0 | 3.5  | 98   |
| SJS6-106-47  | 266  | 57103 | 1.9 | 17.6386 | 2.2  | 0.6392 | 3.8  | 0.0818 | 3.1 | 0.82 | 506.7 | 15.0 | 501.8 | 14.9 | 479.6  | 47.8  | 506.7 | 15.0 | 106  |
| SJS6-106-53  | 328  | 40150 | 1.8 | 17.5006 | 2.0  | 0.6467 | 2.5  | 0.0821 | 1.4 | 0.58 | 508.5 | 7.1  | 506.4 | 9.9  | 497.0  | 44.3  | 508.5 | 7.1  | 102  |
| SJS6-106-74  | 300  | 45114 | 4.7 | 16.9180 | 2.8  | 0.6696 | 3.2  | 0.0822 | 1.7 | 0.52 | 509.0 | 8.1  | 520.4 | 13.1 | 571.1  | 59.9  | 509.0 | 8.1  | 89   |
| SJS6-106-13  | 1007 | 53346 | 4.0 | 17.2093 | 0.6  | 0.6585 | 3.5  | 0.0822 | 3.4 | 0.99 | 509.2 | 16.8 | 513.7 | 14.1 | 533.8  | 13.0  | 509.2 | 16.8 | 95   |
| SJS6-106-28  | 159  | 23317 | 1.0 | 17.5403 | 5.4  | 0.6478 | 5.6  | 0.0824 | 1.4 | 0.26 | 510.5 | 7.0  | 507.1 | 22.2 | 492.0  | 118.5 | 510.5 | 7.0  | 104  |
| SJS6-106-25  | 256  |       |     |         |      |        |      |        |     |      |       |      |       |      |        |       |       |      |      |



| DR Table 1. U-Pb geochronologic analyses and plots. |       |       |      |        |     |        |                |        |     |       |        |      |                    |      |        |      |          |      |      |
|-----------------------------------------------------|-------|-------|------|--------|-----|--------|----------------|--------|-----|-------|--------|------|--------------------|------|--------|------|----------|------|------|
|                                                     |       |       |      |        |     |        | Isotope ratios |        |     |       |        |      | Apparent ages (Ma) |      |        |      |          |      |      |
|                                                     |       |       |      |        |     |        |                |        |     |       |        |      |                    |      |        |      |          |      |      |
| Analysis                                            | U     | 206Pb | U/Th | 206Pb* | ±   | 207Pb* | ±              | 206Pb* | ±   | error | 206Pb* | ±    | 207Pb*             | ±    | 206Pb* | ±    | Best age | ±    | Conc |
|                                                     | (ppm) | 204Pb |      | 207Pb* | (%) | 235U*  | (%)            | 238U   | (%) | corr. | 238U*  | (Ma) | 235U               | (Ma) | 207Pb* | (Ma) | (Ma)     | (Ma) | %    |
|                                                     |       |       |      |        |     |        |                |        |     |       |        |      |                    |      |        |      |          |      |      |

|                        |                |                  |                 |                    |                 |                    |                 |                   |                 |                 |                   |                  |                   |                  |                   |                  |                   |                  |                |
|------------------------|----------------|------------------|-----------------|--------------------|-----------------|--------------------|-----------------|-------------------|-----------------|-----------------|-------------------|------------------|-------------------|------------------|-------------------|------------------|-------------------|------------------|----------------|
| <del>SJS6-106-75</del> | <del>392</del> | <del>2765</del>  | <del>0.8</del>  | <del>12.6980</del> | <del>14.1</del> | <del>1.3701</del>  | <del>14.1</del> | <del>0.1262</del> | <del>0.5</del>  | <del>0.03</del> | <del>766.1</del>  | <del>3.4</del>   | <del>876.2</del>  | <del>82.8</del>  | <del>1165.9</del> | <del>279.9</del> | <del>766.1</del>  | <del>3.4</del>   | <del>66</del>  |
| <del>SJS6-106-69</del> | <del>36</del>  | <del>2172</del>  | <del>0.7</del>  | <del>15.2617</del> | <del>9.7</del>  | <del>1.1417</del>  | <del>9.7</del>  | <del>0.1264</del> | <del>0.5</del>  | <del>0.05</del> | <del>767.2</del>  | <del>3.4</del>   | <del>773.3</del>  | <del>52.4</del>  | <del>791.2</del>  | <del>203.2</del> | <del>767.2</del>  | <del>3.4</del>   | <del>97</del>  |
| <del>SJS6-106-5</del>  | <del>34</del>  | <del>9435</del>  | <del>0.9</del>  | <del>15.4247</del> | <del>12.9</del> | <del>1.1449</del>  | <del>13.3</del> | <del>0.1281</del> | <del>3.1</del>  | <del>0.23</del> | <del>776.9</del>  | <del>22.7</del>  | <del>774.8</del>  | <del>72.2</del>  | <del>768.8</del>  | <del>273.4</del> | <del>776.9</del>  | <del>22.7</del>  | <del>101</del> |
| SJS6-106-23            | 251            | 54237            | 7.2             | 15.0700            | 1.8             | 1.2149             | 2.6             | 0.1328            | 2.0             | 0.74            | 803.8             | 14.8             | 807.5             | 14.7             | 817.7             | 37.1             | 803.8             | 14.8             | 98             |
| SJS6-106-96            | 99             | 22712            | 1.5             | 14.6359            | 3.1             | 1.2867             | 3.5             | 0.1366            | 1.6             | 0.47            | 825.3             | 12.6             | 839.8             | 19.9             | 878.4             | 63.8             | 825.3             | 12.6             | 94             |
| SJS6-106-94            | 393            | 49771            | 1.1             | 14.9504            | 1.1             | 1.2786             | 1.9             | 0.1386            | 1.5             | 0.82            | 837.0             | 12.0             | 836.2             | 10.6             | 834.3             | 22.5             | 837.0             | 12.0             | 100            |
| <del>SJS6-106-93</del> | <del>689</del> | <del>5906</del>  | <del>1.3</del>  | <del>13.9162</del> | <del>4.7</del>  | <del>1.4194</del>  | <del>7.3</del>  | <del>0.1433</del> | <del>5.5</del>  | <del>0.76</del> | <del>863.1</del>  | <del>44.8</del>  | <del>897.1</del>  | <del>43.2</del>  | <del>982.0</del>  | <del>95.4</del>  | <del>863.1</del>  | <del>44.8</del>  | <del>88</del>  |
| SJS6-106-70            | 122            | 35450            | 2.4             | 14.5779            | 2.2             | 1.3850             | 2.8             | 0.1464            | 1.6             | 0.58            | 881.0             | 13.0             | 882.6             | 16.2             | 886.7             | 46.5             | 881.0             | 13.0             | 99             |
| SJS6-106-89            | 345            | 60141            | 2.5             | 14.4837            | 0.9             | 1.4387             | 1.7             | 0.1511            | 1.4             | 0.85            | 907.3             | 12.2             | 905.2             | 10.2             | 900.0             | 18.8             | 907.3             | 12.2             | 101            |
| SJS6-106-91            | 304            | 28721            | 1.8             | 13.9691            | 3.3             | 1.5157             | 3.7             | 0.1536            | 1.6             | 0.43            | 920.9             | 13.4             | 936.8             | 22.4             | 974.2             | 67.5             | 920.9             | 13.4             | 95             |
| SJS6-106-80            | 612            | 103294           | 3.8             | 14.3116            | 0.7             | 1.4881             | 1.3             | 0.1545            | 1.1             | 0.86            | 925.9             | 9.9              | 925.6             | 8.1              | 924.7             | 14.0             | 925.9             | 9.9              | 100            |
| <del>SJS6-106-72</del> | <del>280</del> | <del>27573</del> | <del>18.8</del> | <del>12.5150</del> | <del>2.3</del>  | <del>1.8187</del>  | <del>7.4</del>  | <del>0.1651</del> | <del>7.0</del>  | <del>0.95</del> | <del>984.9</del>  | <del>63.8</del>  | <del>1052.2</del> | <del>48.3</del>  | <del>1194.6</del> | <del>45.9</del>  | <del>1194.6</del> | <del>45.9</del>  | <del>82</del>  |
| SJS6-106-56            | 224            | 47939            | 5.1             | 13.7573            | 1.8             | 1.6875             | 3.3             | 0.1684            | 2.8             | 0.84            | 1003.2            | 25.7             | 1003.8            | 20.9             | 1005.3            | 35.7             | 1005.3            | 35.7             | 100            |
| SJS6-106-21            | 139            | 12220            | 1.2             | 13.0227            | 1.9             | 1.8602             | 2.1             | 0.1757            | 0.8             | 0.37            | 1043.4            | 7.5              | 1067.1            | 13.7             | 1115.7            | 38.3             | 1115.7            | 38.3             | 94             |
| <del>SJS6-106-29</del> | <del>34</del>  | <del>3502</del>  | <del>1.1</del>  | <del>12.5261</del> | <del>7.3</del>  | <del>2.2164</del>  | <del>7.9</del>  | <del>0.2014</del> | <del>3.2</del>  | <del>0.40</del> | <del>1182.6</del> | <del>34.2</del>  | <del>1186.2</del> | <del>55.6</del>  | <del>1192.9</del> | <del>143.8</del> | <del>1192.9</del> | <del>143.8</del> | <del>99</del>  |
| SJS6-106-36            | 376            | 110415           | 2.1             | 10.9215            | 0.6             | 3.1972             | 1.8             | 0.2532            | 1.7             | 0.94            | 1455.2            | 22.0             | 1456.5            | 13.9             | 1458.3            | 11.3             | 1458.3            | 11.3             | 100            |
| <del>SJS6-106-19</del> | <del>53</del>  | <del>30328</del> | <del>1.1</del>  | <del>8.5238</del>  | <del>1.9</del>  | <del>4.7068</del>  | <del>2.1</del>  | <del>0.2910</del> | <del>0.9</del>  | <del>0.43</del> | <del>1646.4</del> | <del>12.8</del>  | <del>1768.5</del> | <del>17.2</del>  | <del>1915.7</del> | <del>33.2</del>  | <del>1915.7</del> | <del>33.2</del>  | <del>86</del>  |
| SJS6-106-45            | 204            | 138454           | 2.2             | 9.2023             | 0.6             | 4.8431             | 1.9             | 0.3232            | 1.8             | 0.95            | 1805.5            | 28.2             | 1792.4            | 15.9             | 1777.2            | 11.0             | 1777.2            | 11.0             | 102            |
| SJS6-106-84            | 119            | 58934            | 1.5             | 7.9900             | 0.8             | 6.2711             | 0.9             | 0.3634            | 0.5             | 0.58            | 1998.3            | 9.2              | 2014.4            | 8.1              | 2031.0            | 13.4             | 2031.0            | 13.4             | 98             |
| SJS6-106-35            | 178            | 90799            | 4.9             | 5.5040             | 1.0             | 11.2755            | 2.0             | 0.4501            | 1.8             | 0.87            | 2395.7            | 35.7             | 2546.2            | 19.0             | 2668.3            | 16.4             | 2668.3            | 16.4             | 90             |
| SJS6-106-17            | 126            | 89297            | 0.7             | 5.6364             | 0.8             | 11.4926            | 1.4             | 0.4698            | 1.1             | 0.80            | 2482.7            | 22.8             | 2564.0            | 13.0             | 2628.9            | 13.9             | 2628.9            | 13.9             | 94             |
| SJS6-106-39            | 83             | 67796            | 1.4             | 5.5056             | 0.6             | 12.0978            | 1.6             | 0.4831            | 1.4             | 0.93            | 2540.6            | 30.4             | 2612.0            | 14.6             | 2667.8            | 9.3              | 2667.8            | 9.3              | 95             |
| <del>SJS6-106-87</del> | <del>85</del>  | <del>29262</del> | <del>1.6</del>  | <del>4.4941</del>  | <del>5.4</del>  | <del>15.6077</del> | <del>20.8</del> | <del>0.5087</del> | <del>20.1</del> | <del>0.97</del> | <del>2651.2</del> | <del>436.6</del> | <del>2853.1</del> | <del>200.7</del> | <del>2999.0</del> | <del>86.3</del>  | <del>2999.0</del> | <del>86.3</del>  | <del>88</del>  |
| SJS6-106-35            | 90             | 9678             | 1.8             | 4.5079             | 1.5             | 16.5050            | 3.2             | 0.5396            | 2.8             | 0.88            | 2781.9            | 63.0             | 2906.5            | 30.2             | 2994.0            | 23.7             | 2994.0            | 23.7             | 93             |
| SJS6-106-64            | 217            | 210683           | 2.7             | 3.9788             | 0.3             | 21.0585            | 3.1             | 0.6077            | 3.1             | 1.00            | 3060.7            | 74.4             | 3141.3            | 29.8             | 3193.2            | 4.7              | 3193.2            | 4.7              | 96             |
| SJS6-106-85            | 42             | 41554            | 2.3             | 3.9378             | 0.7             | 22.4838            | 1.2             | 0.6421            | 0.9             | 0.78            | 3197.4            | 22.8             | 3204.9            | 11.3             | 3209.6            | 11.5             | 3209.6            | 11.5             | 100            |
| SJS6-106-79            | 103            | 86888            | 1.2             | 3.8295             | 0.4             | 23.4332            | 1.5             | 0.6508            | 1.4             | 0.97            | 3231.5            | 36.3             | 3245.1            | 14.3             | 3253.5            | 5.6              | 3253.5            | 5.6              | 99             |
|                        |                |                  |                 |                    |                 |                    |                 |                   |                 |                 |                   |                  |                   |                  |                   |                  |                   |                  |                |
| SJS6114-80             | 136            | 9868             | 2.0             | 17.6563            | 9.6             | 0.5803             | 9.6             | 0.0743            | 0.6             | 0.07            | 462.1             | 2.8              | 464.7             | 35.9             | 477.4             | 212.8            | 462.1             | 2.8              | 97             |
| SJS6114-19             | 341            | 143918           | 2.5             | 17.4409            | 1.3             | 0.5994             | 2.1             | 0.0758            | 1.7             | 0.79            | 471.1             | 7.6              | 476.8             | 8.0              | 504.5             | 28.2             | 471.1             | 7.6              | 93             |
| SJS6114-31             | 209            | 33825            | 1.6             | 17.5308            | 5.2             | 0.5976             | 5.9             | 0.0760            | 2.6             | 0.45            | 472.1             | 11.9             | 475.7             | 22.2             | 493.2             | 115.5            | 472.1             | 11.9             | 96             |
| SJS6114-41             | 200            | 22757            | 1.3             | 17.3712            | 3.7             | 0.6154             | 4.1             | 0.0775            | 1.9             | 0.46            | 481.4             | 8.8              | 487.0             | 15.9             | 513.3             | 80.2             | 481.4             | 8.8              | 94             |
| SJS6114-21             | 111            | 31250            | 2.0             | 17.3182            | 8.5             | 0.6175             | 8.6             | 0.0776            | 1.2             | 0.14            | 481.6             | 5.6              | 488.3             | 33.3             | 520.0             | 186.8            | 481.6             | 5.6              | 93             |
| SJS6114-46             | 483            | 49619            | 1.9             | 17.4551            | 2.2             | 0.6146             | 2.4             | 0.0778            | 0.9             | 0.38            | 483.0             | 4.3              | 486.4             | 9.3              | 502.7             | 48.7             | 483.0             | 4.3              | 96             |
| SJS6114-89             | 39             | 8229             | 2.0             | 19.3621            | 17.3            | 0.5542             | 17.4            | 0.0778            | 2.0             | 0.12            | 483.1             | 9.3              | 447.7             | 63.0             | 269.8             | 398.1            | 483.1             | 9.3              | 179            |
| SJS6114-72             | 75             | 15787            | 1.6             | 16.7715            | 10.2            | 0.6406             | 10.4            | 0.0779            | 2.1             | 0.20            | 483.7             | 9.6              | 502.7             | 41.4             | 590.0             | 222.5            | 483.7             |                  |                |



| DR Table 1. U-Pb geochronologic analyses and plots. |       |       |      |        |     |        |                |        |     |       |        |      |                    |      |        |      |          |      |      |
|-----------------------------------------------------|-------|-------|------|--------|-----|--------|----------------|--------|-----|-------|--------|------|--------------------|------|--------|------|----------|------|------|
|                                                     |       |       |      |        |     |        | Isotope ratios |        |     |       |        |      | Apparent ages (Ma) |      |        |      |          |      |      |
|                                                     |       |       |      |        |     |        |                |        |     |       |        |      |                    |      |        |      |          |      |      |
| Analysis                                            | U     | 206Pb | U/Th | 206Pb* | ±   | 207Pb* | ±              | 206Pb* | ±   | error | 206Pb* | ±    | 207Pb*             | ±    | 206Pb* | ±    | Best age | ±    | Conc |
|                                                     | (ppm) | 204Pb |      | 207Pb* | (%) | 235U*  | (%)            | 238U   | (%) | corr. | 238U*  | (Ma) | 235U               | (Ma) | 207Pb* | (Ma) | (Ma)     | (Ma) | %    |
|                                                     |       |       |      |        |     |        |                |        |     |       |        |      |                    |      |        |      |          |      |      |

|                       |                |                  |                |                    |                 |                   |                 |                   |                 |                 |                  |                  |                  |                  |                   |                  |                  |                  |                |
|-----------------------|----------------|------------------|----------------|--------------------|-----------------|-------------------|-----------------|-------------------|-----------------|-----------------|------------------|------------------|------------------|------------------|-------------------|------------------|------------------|------------------|----------------|
| SJS6114-78            | 558            | 194120           | 2.3            | 17.4173            | 2.0             | 0.6632            | 2.7             | 0.0838            | 1.8             | 0.66            | 518.6            | 8.9              | 516.6            | 11.0             | 507.5             | 45.0             | 518.6            | 8.9              | 102            |
| SJS6114-16            | 396            | 29042            | 1.0            | 17.3663            | 1.7             | 0.6654            | 2.2             | 0.0838            | 1.3             | 0.62            | 518.8            | 6.6              | 517.9            | 8.8              | 513.9             | 37.5             | 518.8            | 6.6              | 101            |
| SJS6114-99            | 121            | 5541             | 1.6            | 17.0535            | 5.4             | 0.6787            | 5.7             | 0.0839            | 1.8             | 0.32            | 519.6            | 9.2              | 526.0            | 23.4             | 553.7             | 118.0            | 519.6            | 9.2              | 94             |
| SJS6114-45            | 168            | 17192            | 1.0            | 17.4217            | 4.7             | 0.6659            | 4.8             | 0.0841            | 0.8             | 0.17            | 520.8            | 4.1              | 518.2            | 19.5             | 506.9             | 104.2            | 520.8            | 4.1              | 103            |
| SJS6114-54            | 270            | 126981           | 1.5            | 16.8867            | 1.4             | 0.6874            | 1.6             | 0.0842            | 0.8             | 0.49            | 521.1            | 4.0              | 531.2            | 6.8              | 575.1             | 31.0             | 521.1            | 4.0              | 91             |
| SJS6114-82            | 77             | 20951            | 2.4            | 16.4959            | 6.4             | 0.7044            | 6.5             | 0.0843            | 1.6             | 0.24            | 521.6            | 7.8              | 541.4            | 27.5             | 625.8             | 137.1            | 521.6            | 7.8              | 83             |
| SJS6114-61            | 143            | 13452            | 1.3            | 17.5220            | 8.2             | 0.6639            | 8.2             | 0.0844            | 1.0             | 0.12            | 522.2            | 4.8              | 517.0            | 33.4             | 494.3             | 180.8            | 522.2            | 4.8              | 106            |
| SJS6114-58            | 122            | 29794            | 3.8            | 17.1280            | 5.7             | 0.6821            | 5.8             | 0.0847            | 1.0             | 0.18            | 524.3            | 5.1              | 528.0            | 23.7             | 544.2             | 123.9            | 524.3            | 5.1              | 96             |
| SJS6114-76            | 80             | 22484            | 2.6            | 17.2714            | 8.4             | 0.6790            | 8.5             | 0.0851            | 1.4             | 0.16            | 526.2            | 7.0              | 526.2            | 35.1             | 525.9             | 185.3            | 526.2            | 7.0              | 100            |
| SJS6114-62            | 54             | 8920             | 3.0            | 17.5583            | 14.0            | 0.6680            | 14.0            | 0.0851            | 0.9             | 0.07            | 526.3            | 4.8              | 519.5            | 56.9             | 489.7             | 309.2            | 526.3            | 4.8              | 107            |
| SJS6114-44            | 139            | 27708            | 1.2            | 17.9435            | 6.4             | 0.6566            | 6.7             | 0.0854            | 2.0             | 0.29            | 528.6            | 9.9              | 512.5            | 26.9             | 441.6             | 142.5            | 528.6            | 9.9              | 120            |
| SJS6114-84            | 354            | 62664            | 1.3            | 17.1479            | 1.5             | 0.6882            | 1.7             | 0.0856            | 0.8             | 0.47            | 529.4            | 4.1              | 531.7            | 7.0              | 541.7             | 32.9             | 529.4            | 4.1              | 98             |
| SJS6114-1             | 580            | 63517            | 3.4            | 17.1674            | 0.8             | 0.6890            | 1.1             | 0.0858            | 0.8             | 0.68            | 530.6            | 3.9              | 532.2            | 4.7              | 539.2             | 18.4             | 530.6            | 3.9              | 98             |
| SJS6114-88            | 285            | 30495            | 1.6            | 17.3277            | 2.0             | 0.6828            | 2.7             | 0.0858            | 1.9             | 0.70            | 530.7            | 9.8              | 528.5            | 11.3             | 518.8             | 42.8             | 530.7            | 9.8              | 102            |
| SJS6114-56            | 129            | 15855            | 2.5            | 17.4579            | 5.2             | 0.6848            | 5.6             | 0.0867            | 1.8             | 0.33            | 536.0            | 9.4              | 529.7            | 22.9             | 502.4             | 115.6            | 536.0            | 9.4              | 107            |
| SJS6114-18            | 103            | 23821            | 3.6            | 17.8433            | 7.0             | 0.6707            | 7.0             | 0.0868            | 0.9             | 0.12            | 536.5            | 4.5              | 521.1            | 28.7             | 454.1             | 155.2            | 536.5            | 4.5              | 118            |
| SJS6114-10            | 133            | 16621            | 2.8            | 17.7389            | 2.7             | 0.6880            | 3.0             | 0.0885            | 1.3             | 0.44            | 546.8            | 6.9              | 531.6            | 12.4             | 467.1             | 59.7             | 546.8            | 6.9              | 117            |
| SJS6114-39            | 34             | 7561             | 2.6            | 17.0434            | 11.9            | 0.7164            | 11.9            | 0.0886            | 1.2             | 0.10            | 547.0            | 6.1              | 548.6            | 50.6             | 555.0             | 260.0            | 547.0            | 6.1              | 99             |
| SJS6114-70            | 358            | 9515             | 1.7            | 16.9744            | 1.6             | 0.7294            | 2.2             | 0.0898            | 1.4             | 0.67            | 554.3            | 7.7              | 556.2            | 9.3              | 563.8             | 35.3             | 554.3            | 7.7              | 98             |
| <del>SJS6114-28</del> | <del>204</del> | <del>18588</del> | <del>2.7</del> | <del>12.1878</del> | <del>33.6</del> | <del>1.0653</del> | <del>33.8</del> | <del>0.0942</del> | <del>2.8</del>  | <del>0.08</del> | <del>580.1</del> | <del>15.4</del>  | <del>736.4</del> | <del>178.6</del> | <del>1246.7</del> | <del>678.1</del> | <del>580.1</del> | <del>15.4</del>  | <del>47</del>  |
| <del>SJS6114-68</del> | <del>302</del> | <del>37458</del> | <del>2.2</del> | <del>15.1227</del> | <del>1.2</del>  | <del>1.0485</del> | <del>2.4</del>  | <del>0.1150</del> | <del>2.0</del>  | <del>0.87</del> | <del>701.7</del> | <del>13.6</del>  | <del>728.1</del> | <del>12.2</del>  | <del>810.3</del>  | <del>24.5</del>  | <del>701.7</del> | <del>13.6</del>  | <del>87</del>  |
| SJS6114-8             | 220            | 30837            | 1.8            | 15.4068            | 2.6             | 1.0515            | 3.8             | 0.1175            | 2.7             | 0.73            | 716.1            | 18.5             | 729.6            | 19.6             | 771.3             | 54.6             | 716.1            | 18.5             | 93             |
| <del>SJS6114-75</del> | <del>32</del>  | <del>10212</del> | <del>1.3</del> | <del>15.3944</del> | <del>4.4</del>  | <del>1.0824</del> | <del>4.5</del>  | <del>0.1209</del> | <del>1.1</del>  | <del>0.24</del> | <del>735.5</del> | <del>7.5</del>   | <del>744.8</del> | <del>24.0</del>  | <del>773.0</del>  | <del>93.0</del>  | <del>735.5</del> | <del>7.5</del>   | <del>95</del>  |
| SJS6114-86            | 1050           | 7129             | 2.4            | 12.1371            | 1.7             | 1.3845            | 4.1             | 0.1219            | 3.7             | 0.91            | 741.4            | 26.2             | 882.4            | 24.4             | 1254.8            | 34.2             | 741.4            | 26.2             | 59             |
| <del>SJS6114-34</del> | <del>153</del> | <del>51986</del> | <del>2.5</del> | <del>13.1560</del> | <del>25.0</del> | <del>1.2854</del> | <del>54.9</del> | <del>0.1227</del> | <del>48.9</del> | <del>0.89</del> | <del>745.8</del> | <del>344.9</del> | <del>839.3</del> | <del>324.3</del> | <del>1095.4</del> | <del>507.9</del> | <del>745.8</del> | <del>344.9</del> | <del>68</del>  |
| SJS6114-52            | 33             | 14624            | 0.9            | 15.0647            | 3.1             | 1.1347            | 4.2             | 0.1240            | 2.8             | 0.67            | 753.4            | 20.2             | 770.0            | 22.8             | 818.4             | 65.2             | 753.4            | 20.2             | 92             |
| <del>SJS6114-87</del> | <del>47</del>  | <del>8077</del>  | <del>1.0</del> | <del>15.6474</del> | <del>8.9</del>  | <del>1.1115</del> | <del>9.1</del>  | <del>0.1261</del> | <del>1.8</del>  | <del>0.20</del> | <del>765.8</del> | <del>13.3</del>  | <del>758.9</del> | <del>48.5</del>  | <del>738.6</del>  | <del>188.4</del> | <del>765.8</del> | <del>13.3</del>  | <del>104</del> |
| SJS6114-37            | 20             | 15599            | 0.6            | 14.8564            | 2.4             | 1.1791            | 2.8             | 0.1270            | 1.4             | 0.49            | 771.0            | 9.9              | 790.9            | 15.2             | 847.4             | 50.3             | 771.0            | 9.9              | 91             |
| SJS6114-94            | 44             | 8026             | 1.0            | 15.4417            | 2.9             | 1.1446            | 3.2             | 0.1282            | 1.3             | 0.39            | 777.5            | 9.2              | 774.7            | 17.3             | 766.5             | 61.6             | 777.5            | 9.2              | 101            |
| SJS6114-33            | 178            | 36634            | 1.2            | 15.1184            | 1.0             | 1.2272            | 2.3             | 0.1346            | 2.1             | 0.89            | 813.8            | 15.9             | 813.1            | 13.0             | 811.0             | 21.7             | 813.8            | 15.9             | 100            |
| <del>SJS6114-35</del> | <del>47</del>  | <del>18453</del> | <del>1.9</del> | <del>14.4260</del> | <del>5.4</del>  | <del>1.2926</del> | <del>6.1</del>  | <del>0.1352</del> | <del>2.7</del>  | <del>0.44</del> | <del>817.7</del> | <del>20.6</del>  | <del>842.4</del> | <del>34.8</del>  | <del>908.2</del>  | <del>112.3</del> | <del>817.7</del> | <del>20.6</del>  | <del>90</del>  |
| SJS6114-26            | 65             | 9005             | 1.7            | 14.8254            | 3.8             | 1.2790            | 4.3             | 0.1375            | 2.0             | 0.47            | 830.7            | 15.8             | 836.4            | 24.7             | 851.8             | 79.7             | 830.7            | 15.8             | 98             |
| SJS6114-9             | 81             | 24523            | 1.5            | 14.9502            | 3.0             | 1.3206            | 3.5             | 0.1432            | 1.9             | 0.55            | 862.7            | 15.7             | 854.8            | 20.4             | 834.3             | 61.5             | 862.7            | 15.7             | 103            |
| SJS6114-95            | 427            | 106016           | 6.0            | 14.1846            | 0.6             | 1.4926            | 1.1             | 0.1536            | 1.0             | 0.86            | 920.8            | 8.5              | 927.4            | 6.9              | 942.9             | 11.9             | 920.8            | 8.5              | 98             |
| SJS6114-48            | 352            | 84870            | 3.2            | 9.6375             | 0.5             | 4.0718            | 2.3             | 0.2846            | 2.3             | 0.98            | 1614.6           | 32.7             | 1648.7           | 19.1             | 1692.4            | 8.8              | 1692.4           | 8.8              | 95             |
| SJS6114-24            | 135            | 175355           | 1.6            | 9.3279             | 1.2             | 4.4384            | 2.1             | 0.3003            | 1.8             | 0.83            | 1692.6           | 26.1             | 1719.5           | 17.5             | 1752.4            | 21.7             | 1752.4           | 21.7             | 97             |
| <del>SJS6114-3</del>  | <del>266</del> | <del>93359</del> | <del>6.1</del> | <del>7.8237</del>  | <del>2.2</del>  | <del>5.6351</del> | <del>2.8</del>  | <del>0.3198</del> | <del>1.7</del>  | <del>0.</del>   |                  |                  |                  |                  |                   |                  |                  |                  |                |

| DR Table 1. U-Pb geochronologic analyses and plots. |       |       |      |        |     |        |                |        |     |       |        |      |                    |      |        |      |          |      |      |
|-----------------------------------------------------|-------|-------|------|--------|-----|--------|----------------|--------|-----|-------|--------|------|--------------------|------|--------|------|----------|------|------|
|                                                     |       |       |      |        |     |        | Isotope ratios |        |     |       |        |      | Apparent ages (Ma) |      |        |      |          |      |      |
|                                                     |       |       |      |        |     |        |                |        |     |       |        |      |                    |      |        |      |          |      |      |
| Analysis                                            | U     | 206Pb | U/Th | 206Pb* | ±   | 207Pb* | ±              | 206Pb* | ±   | error | 206Pb* | ±    | 207Pb*             | ±    | 206Pb* | ±    | Best age | ±    | Conc |
|                                                     | (ppm) | 204Pb |      | 207Pb* | (%) | 235U*  | (%)            | 238U   | (%) | corr. | 238U*  | (Ma) | 235U               | (Ma) | 207Pb* | (Ma) | (Ma)     | (Ma) | %    |
|                                                     |       |       |      |        |     |        |                |        |     |       |        |      |                    |      |        |      |          |      |      |

|             |     |        |     |         |      |        |      |        |     |      |       |      |       |      |        |       |       |      |     |
|-------------|-----|--------|-----|---------|------|--------|------|--------|-----|------|-------|------|-------|------|--------|-------|-------|------|-----|
| TSA-138-70  | 332 | 56025  | 2.6 | 17.8414 | 2.0  | 0.5998 | 3.7  | 0.0776 | 3.1 | 0.85 | 481.9 | 14.6 | 477.1 | 14.2 | 454.4  | 44.0  | 481.9 | 14.6 | 106 |
| TSA-138-86  | 61  | 9957   | 2.2 | 18.0294 | 13.2 | 0.5968 | 13.2 | 0.0780 | 0.9 | 0.07 | 484.4 | 4.4  | 475.2 | 50.3 | 431.0  | 295.3 | 484.4 | 4.4  | 112 |
| TSA-138-100 | 125 | 35165  | 0.9 | 18.0510 | 6.5  | 0.6001 | 7.0  | 0.0786 | 2.5 | 0.36 | 487.6 | 11.7 | 477.3 | 26.6 | 428.3  | 145.8 | 487.6 | 11.7 | 114 |
| TSA-138-38  | 88  | 15716  | 2.4 | 17.2452 | 10.5 | 0.6299 | 10.7 | 0.0788 | 1.8 | 0.17 | 488.8 | 8.3  | 496.0 | 41.8 | 529.3  | 230.9 | 488.8 | 8.3  | 92  |
| TSA-138-17  | 146 | 20664  | 2.0 | 17.2858 | 7.0  | 0.6290 | 7.2  | 0.0789 | 1.7 | 0.23 | 489.3 | 7.8  | 495.5 | 28.2 | 524.1  | 153.7 | 489.3 | 7.8  | 93  |
| TSA-138-53  | 238 | 17540  | 1.0 | 16.9932 | 5.8  | 0.6399 | 7.2  | 0.0789 | 4.3 | 0.60 | 489.3 | 20.2 | 502.2 | 28.5 | 561.4  | 125.8 | 489.3 | 20.2 | 87  |
| TSA-138-16  | 220 | 22550  | 1.7 | 17.9214 | 2.3  | 0.6070 | 3.0  | 0.0789 | 1.9 | 0.63 | 489.5 | 8.9  | 481.6 | 11.5 | 444.4  | 52.2  | 489.5 | 8.9  | 110 |
| TSA-138-96  | 68  | 12203  | 1.0 | 17.1402 | 8.6  | 0.6367 | 8.8  | 0.0792 | 1.8 | 0.21 | 491.1 | 8.6  | 500.3 | 34.8 | 542.6  | 188.6 | 491.1 | 8.6  | 91  |
| TSA-138-61  | 198 | 36448  | 1.9 | 17.4962 | 3.3  | 0.6297 | 3.7  | 0.0799 | 1.8 | 0.48 | 495.5 | 8.6  | 495.9 | 14.6 | 497.5  | 72.0  | 495.5 | 8.6  | 100 |
| TSA-138-56  | 419 | 61138  | 2.7 | 17.0868 | 1.6  | 0.6472 | 2.2  | 0.0802 | 1.5 | 0.68 | 497.3 | 7.3  | 506.8 | 8.8  | 549.4  | 35.3  | 497.3 | 7.3  | 91  |
| TSA-138-88  | 696 | 108425 | 1.8 | 17.6220 | 0.7  | 0.6313 | 2.9  | 0.0807 | 2.8 | 0.97 | 500.2 | 13.5 | 496.9 | 11.4 | 481.7  | 16.1  | 500.2 | 13.5 | 104 |
| TSA-138-24  | 516 | 52938  | 0.8 | 17.4092 | 1.9  | 0.6391 | 2.2  | 0.0807 | 1.0 | 0.48 | 500.3 | 5.0  | 501.8 | 8.5  | 508.5  | 41.5  | 500.3 | 5.0  | 98  |
| TSA-138-44  | 232 | 40106  | 3.0 | 16.9996 | 4.0  | 0.6567 | 4.1  | 0.0810 | 0.6 | 0.14 | 501.9 | 2.7  | 512.6 | 16.4 | 560.6  | 87.9  | 501.9 | 2.7  | 90  |
| TSA-138-85  | 309 | 49977  | 1.4 | 17.1947 | 1.9  | 0.6534 | 2.5  | 0.0815 | 1.7 | 0.66 | 505.0 | 8.0  | 510.6 | 10.1 | 535.7  | 41.7  | 505.0 | 8.0  | 94  |
| TSA-138-87  | 90  | 17781  | 2.0 | 16.8503 | 7.1  | 0.6695 | 7.4  | 0.0818 | 2.0 | 0.27 | 507.0 | 9.6  | 520.4 | 30.0 | 579.8  | 154.6 | 507.0 | 9.6  | 87  |
| TSA-138-60  | 184 | 36494  | 3.1 | 17.4216 | 4.8  | 0.6478 | 5.0  | 0.0818 | 1.4 | 0.29 | 507.1 | 7.0  | 507.1 | 19.9 | 506.9  | 104.8 | 507.1 | 7.0  | 100 |
| TSA-138-3   | 427 | 7416   | 2.9 | 16.5051 | 4.5  | 0.6871 | 5.0  | 0.0822 | 2.1 | 0.42 | 509.5 | 10.3 | 531.1 | 20.5 | 624.6  | 96.8  | 509.5 | 10.3 | 82  |
| TSA-138-41  | 372 | 65001  | 1.2 | 17.3022 | 1.7  | 0.6575 | 3.1  | 0.0825 | 2.5 | 0.83 | 511.1 | 12.5 | 513.1 | 12.3 | 522.0  | 37.7  | 511.1 | 12.5 | 98  |
| TSA-138-19  | 398 | 62511  | 1.6 | 17.2225 | 1.9  | 0.6612 | 3.5  | 0.0826 | 2.9 | 0.84 | 511.6 | 14.5 | 515.3 | 14.2 | 532.2  | 41.5  | 511.6 | 14.5 | 96  |
| TSA-138-37  | 184 | 27776  | 1.7 | 17.5002 | 4.8  | 0.6564 | 5.8  | 0.0833 | 3.3 | 0.56 | 515.8 | 16.1 | 512.4 | 23.3 | 497.0  | 105.8 | 515.8 | 16.1 | 104 |
| TSA-138-57  | 311 | 53794  | 3.1 | 17.1878 | 2.3  | 0.6698 | 2.6  | 0.0835 | 1.1 | 0.44 | 517.0 | 5.6  | 520.6 | 10.5 | 536.6  | 50.7  | 517.0 | 5.6  | 96  |
| TSA-138-73  | 118 | 23646  | 1.8 | 17.5799 | 9.7  | 0.6572 | 9.9  | 0.0838 | 1.7 | 0.17 | 518.7 | 8.6  | 512.9 | 39.8 | 487.0  | 215.4 | 518.7 | 8.6  | 107 |
| TSA-138-63  | 379 | 72365  | 0.8 | 17.1934 | 1.8  | 0.6758 | 2.9  | 0.0843 | 2.3 | 0.78 | 521.6 | 11.4 | 524.2 | 11.8 | 535.8  | 39.3  | 521.6 | 11.4 | 97  |
| TSA-138-43  | 626 | 123281 | 2.7 | 17.4963 | 1.2  | 0.6695 | 1.7  | 0.0850 | 1.2 | 0.72 | 525.7 | 6.0  | 520.4 | 6.8  | 497.5  | 25.6  | 525.7 | 6.0  | 106 |
| TSA-138-30  | 151 | 2916   | 1.2 | 13.3503 | 20.3 | 0.8826 | 20.3 | 0.0855 | 1.4 | 0.07 | 528.6 | 7.1  | 642.4 | 97.1 | 1066.0 | 412.2 | 528.6 | 7.1  | 50  |
| TSA-138-64  | 312 | 40469  | 0.9 | 17.0633 | 2.6  | 0.6963 | 3.2  | 0.0862 | 1.8 | 0.57 | 532.8 | 9.2  | 536.6 | 13.2 | 552.5  | 57.0  | 532.8 | 9.2  | 96  |
| TSA-138-79  | 169 | 31425  | 0.6 | 17.5049 | 3.3  | 0.6826 | 4.6  | 0.0867 | 3.2 | 0.70 | 535.8 | 16.7 | 528.3 | 19.1 | 496.4  | 73.3  | 535.8 | 16.7 | 108 |
| TSA-138-66  | 197 | 42420  | 2.7 | 17.1875 | 3.5  | 0.6953 | 4.5  | 0.0867 | 2.7 | 0.62 | 535.8 | 14.1 | 536.0 | 18.6 | 536.6  | 76.9  | 535.8 | 14.1 | 100 |
| TSA-138-92  | 248 | 52706  | 1.2 | 17.3617 | 2.5  | 0.6930 | 3.6  | 0.0873 | 2.6 | 0.73 | 539.3 | 13.6 | 534.6 | 15.0 | 514.5  | 54.5  | 539.3 | 13.6 | 105 |
| TSA-138-69  | 64  | 12233  | 1.9 | 18.4387 | 9.3  | 0.6611 | 9.6  | 0.0884 | 2.5 | 0.26 | 546.1 | 13.2 | 515.3 | 38.9 | 380.8  | 209.2 | 546.1 | 13.2 | 143 |
| TSA-138-11  | 152 | 35574  | 2.3 | 17.3374 | 5.6  | 0.7044 | 6.2  | 0.0886 | 2.6 | 0.43 | 547.1 | 13.9 | 541.4 | 25.8 | 517.6  | 122.1 | 547.1 | 13.9 | 106 |
| TSA-138-6   | 132 | 24003  | 1.3 | 17.1978 | 2.8  | 0.7103 | 3.3  | 0.0886 | 1.8 | 0.54 | 547.2 | 9.5  | 544.9 | 14.1 | 535.3  | 61.4  | 547.2 | 9.5  | 102 |
| TSA-138-72  | 67  | 12440  | 4.2 | 17.4571 | 8.4  | 0.7075 | 8.6  | 0.0896 | 1.8 | 0.21 | 553.1 | 9.6  | 543.3 | 36.2 | 502.5  | 185.3 | 553.1 | 9.6  | 110 |
| TSA-138-14  | 263 | 71220  | 2.2 | 16.8073 | 2.8  | 0.7772 | 3.0  | 0.0947 | 1.1 | 0.36 | 583.5 | 6.1  | 583.9 | 13.5 | 585.4  | 61.7  | 583.5 | 6.1  | 100 |
| TSA-138-98  | 193 | 32011  | 0.6 | 16.6331 | 3.4  | 0.7888 | 3.7  | 0.0952 | 1.5 | 0.40 | 586.0 | 8.3  | 590.5 | 16.5 | 607.9  | 72.9  | 586.0 | 8.3  | 96  |
| TSA-138-99  | 533 | 143203 | 1.4 | 16.6555 | 1.3  | 0.8322 | 2.4  | 0.1005 | 2.0 | 0.83 | 617.5 | 11.7 | 614.8 | 11.1 | 605.0  | 29.0  | 617.5 | 11.7 | 102 |
| TSA-138-59  | 257 | 45397  | 3.6 | 16.0932 | 1.9  | 0.8744 | 3.2  | 0.1021 | 2.5 | 0.80 | 626.4 | 15.2 | 637.9 | 15.1 | 678.8  | 41.2  | 626.4 | 15.2 | 92  |
| TSA-138-62  | 219 | 45261  | 0.5 | 16.2861 | 2.0  | 0.8784 | 2.3  | 0.1038 | 1.1 | 0.47 | 636.4 | 6.6  | 640.1 | 11.0 | 653.3  | 43.8  | 636.4 | 6.6  | 97  |
| TSA-138-84  | 215 | 31869  | 1.2 | 15.3300 | 2.8  | 1.0358 | 5.8  | 0.1152 | 5.0 | 0.88 | 702.6 | 33.6 | 721.8 | 29.8 | 781.8  | 58.6  | 702.6 | 33.6 | 90  |
| TSA-138-21  | 74  | 30269  | 1.1 |         |      |        |      |        |     |      |       |      |       |      |        |       |       |      |     |



| DR Table 1. U-Pb geochronologic analyses and plots. |       |       |      |        |     |        |                |        |     |       |        |      |                    |      |        |      |          |      |      |
|-----------------------------------------------------|-------|-------|------|--------|-----|--------|----------------|--------|-----|-------|--------|------|--------------------|------|--------|------|----------|------|------|
|                                                     |       |       |      |        |     |        | Isotope ratios |        |     |       |        |      | Apparent ages (Ma) |      |        |      |          |      |      |
|                                                     |       |       |      |        |     |        |                |        |     |       |        |      |                    |      |        |      |          |      |      |
| Analysis                                            | U     | 206Pb | U/Th | 206Pb* | ±   | 207Pb* | ±              | 206Pb* | ±   | error | 206Pb* | ±    | 207Pb*             | ±    | 206Pb* | ±    | Best age | ±    | Conc |
|                                                     | (ppm) | 204Pb |      | 207Pb* | (%) | 235U*  | (%)            | 238U   | (%) | corr. | 238U*  | (Ma) | 235U               | (Ma) | 207Pb* | (Ma) | (Ma)     | (Ma) | %    |
|                                                     |       |       |      |        |     |        |                |        |     |       |        |      |                    |      |        |      |          |      |      |

|           |      |        |     |         |      |        |      |        |      |      |       |      |       |      |       |       |       |      |     |
|-----------|------|--------|-----|---------|------|--------|------|--------|------|------|-------|------|-------|------|-------|-------|-------|------|-----|
| CH-4D1-12 | 146  | 13676  | 1.7 | 18.9271 | 8.6  | 0.4571 | 8.6  | 0.0627 | 0.7  | 0.09 | 392.3 | 2.8  | 382.2 | 27.3 | 321.7 | 194.6 | 392.3 | 2.8  | 122 |
| CH-4D1-83 | 218  | 32112  | 1.6 | 18.2384 | 5.0  | 0.4761 | 5.3  | 0.0630 | 2.0  | 0.37 | 393.7 | 7.5  | 395.4 | 17.5 | 405.2 | 111.2 | 393.7 | 7.5  | 97  |
| CH-4D1-84 | 410  | 69079  | 2.6 | 18.4655 | 3.7  | 0.4738 | 5.4  | 0.0635 | 4.0  | 0.73 | 396.6 | 15.2 | 393.8 | 17.8 | 377.5 | 83.8  | 396.6 | 15.2 | 105 |
| CH-4D1-22 | 85   | 8741   | 1.5 | 18.6933 | 16.7 | 0.4757 | 16.9 | 0.0645 | 2.9  | 0.17 | 402.9 | 11.5 | 395.1 | 55.5 | 349.9 | 379.5 | 402.9 | 11.5 | 115 |
| CH-4D1-69 | 70   | 19830  | 1.4 | 18.5411 | 12.3 | 0.4804 | 12.4 | 0.0646 | 1.7  | 0.14 | 403.5 | 6.8  | 398.3 | 40.8 | 368.3 | 277.3 | 403.5 | 6.8  | 110 |
| CH-4D1-64 | 162  | 19398  | 1.0 | 18.2991 | 5.6  | 0.4937 | 5.7  | 0.0655 | 0.8  | 0.14 | 409.1 | 3.2  | 407.4 | 19.0 | 397.8 | 125.6 | 409.1 | 3.2  | 103 |
| CH-4D1-10 | 65   | 5840   | 1.8 | 15.2350 | 18.1 | 0.5939 | 18.3 | 0.0656 | 2.0  | 0.11 | 409.7 | 8.0  | 473.4 | 69.2 | 794.8 | 383.5 | 409.7 | 8.0  | 52  |
| CH-4D1-89 | 253  | 16327  | 1.7 | 17.6345 | 5.3  | 0.5135 | 5.4  | 0.0657 | 0.6  | 0.12 | 410.0 | 2.5  | 420.8 | 18.5 | 480.1 | 117.7 | 410.0 | 2.5  | 85  |
| CH-4D1-45 | 377  | 47607  | 1.4 | 17.6932 | 4.2  | 0.5121 | 4.6  | 0.0657 | 1.9  | 0.41 | 410.3 | 7.5  | 419.9 | 15.7 | 472.8 | 91.9  | 410.3 | 7.5  | 87  |
| CH-4D1-24 | 330  | 11275  | 1.9 | 17.2613 | 4.7  | 0.5252 | 4.8  | 0.0657 | 0.9  | 0.20 | 410.5 | 3.7  | 428.6 | 16.7 | 527.3 | 102.8 | 410.5 | 3.7  | 78  |
| CH-4D1-44 | 274  | 25457  | 1.5 | 18.0528 | 3.1  | 0.5031 | 3.2  | 0.0659 | 0.5  | 0.15 | 411.2 | 1.9  | 413.8 | 10.8 | 428.1 | 69.7  | 411.2 | 1.9  | 96  |
| CH-4D1-11 | 350  | 40428  | 1.9 | 18.5778 | 1.9  | 0.4921 | 2.8  | 0.0663 | 2.1  | 0.75 | 413.9 | 8.5  | 406.3 | 9.5  | 363.8 | 42.3  | 413.9 | 8.5  | 114 |
| CH-4D1-46 | 407  | 59679  | 1.4 | 18.3767 | 1.6  | 0.4978 | 2.7  | 0.0663 | 2.2  | 0.81 | 414.1 | 8.9  | 410.2 | 9.3  | 388.3 | 35.9  | 414.1 | 8.9  | 107 |
| CH-4D1-93 | 166  | 40662  | 2.0 | 18.2054 | 6.2  | 0.5026 | 6.6  | 0.0664 | 2.2  | 0.33 | 414.2 | 8.8  | 413.5 | 22.3 | 409.3 | 138.4 | 414.2 | 8.8  | 101 |
| CH-4D1-9  | 92   | 17221  | 3.0 | 16.8399 | 10.6 | 0.5451 | 10.6 | 0.0666 | 1.0  | 0.09 | 415.5 | 3.9  | 441.8 | 38.0 | 581.2 | 230.1 | 415.5 | 3.9  | 71  |
| CH-4D1-35 | 173  | 15380  | 1.2 | 17.3558 | 4.7  | 0.5318 | 5.1  | 0.0669 | 2.1  | 0.41 | 417.7 | 8.5  | 433.0 | 18.0 | 515.2 | 102.5 | 417.7 | 8.5  | 81  |
| CH-4D1-91 | 487  | 59738  | 2.1 | 17.9653 | 1.2  | 0.5145 | 2.6  | 0.0670 | 2.3  | 0.89 | 418.3 | 9.4  | 421.5 | 9.0  | 438.9 | 26.8  | 418.3 | 9.4  | 95  |
| CH-4D1-5  | 281  | 42742  | 1.9 | 18.3220 | 2.5  | 0.5046 | 2.8  | 0.0671 | 1.2  | 0.42 | 418.4 | 4.7  | 414.8 | 9.4  | 395.0 | 55.9  | 418.4 | 4.7  | 106 |
| CH-4D1-41 | 132  | 21488  | 2.1 | 18.7510 | 6.7  | 0.4953 | 7.8  | 0.0674 | 4.1  | 0.52 | 420.2 | 16.5 | 408.5 | 26.3 | 342.9 | 151.3 | 420.2 | 16.5 | 123 |
| CH-4D1-54 | 337  | 56553  | 1.3 | 18.1805 | 4.4  | 0.5110 | 4.5  | 0.0674 | 1.1  | 0.25 | 420.3 | 4.6  | 419.1 | 15.4 | 412.4 | 97.3  | 420.3 | 4.6  | 102 |
| CH-4D1-52 | 194  | 45828  | 2.2 | 18.7036 | 5.1  | 0.4980 | 5.3  | 0.0676 | 1.3  | 0.24 | 421.4 | 5.2  | 410.4 | 17.8 | 348.6 | 115.6 | 421.4 | 5.2  | 121 |
| CH-4D1-52 | 338  | 38791  | 1.3 | 16.6203 | 8.0  | 0.5605 | 17.9 | 0.0676 | 16.0 | 0.89 | 421.5 | 65.1 | 451.9 | 65.2 | 609.6 | 173.3 | 421.5 | 65.1 | 69  |
| CH-4D1-68 | 65   | 13606  | 0.8 | 18.1137 | 10.3 | 0.5194 | 10.4 | 0.0682 | 1.6  | 0.15 | 425.5 | 6.5  | 424.7 | 36.2 | 420.6 | 230.6 | 425.5 | 6.5  | 101 |
| CH-4D1-63 | 64   | 18701  | 1.9 | 15.9798 | 8.7  | 0.5944 | 8.8  | 0.0689 | 0.9  | 0.10 | 429.5 | 3.7  | 473.7 | 33.3 | 694.0 | 186.8 | 429.5 | 3.7  | 62  |
| CH-4D1-57 | 439  | 38748  | 2.0 | 17.9549 | 1.9  | 0.5291 | 3.6  | 0.0689 | 3.1  | 0.85 | 429.5 | 12.7 | 431.2 | 12.7 | 440.2 | 42.6  | 429.5 | 12.7 | 98  |
| CH-4D1-65 | 224  | 8288   | 1.9 | 17.3970 | 4.3  | 0.5464 | 4.5  | 0.0689 | 1.3  | 0.30 | 429.8 | 5.6  | 442.6 | 16.2 | 510.1 | 94.7  | 429.8 | 5.6  | 84  |
| CH-4D1-34 | 132  | 17891  | 2.2 | 19.1427 | 6.1  | 0.4987 | 6.2  | 0.0692 | 1.1  | 0.17 | 431.6 | 4.5  | 410.8 | 21.0 | 295.9 | 140.1 | 431.6 | 4.5  | 146 |
| CH-4D1-17 | 266  | 56181  | 2.1 | 18.5287 | 2.4  | 0.5174 | 2.7  | 0.0695 | 1.0  | 0.39 | 433.3 | 4.3  | 423.4 | 9.2  | 369.8 | 55.1  | 433.3 | 4.3  | 117 |
| CH-4D1-88 | 455  | 31753  | 2.3 | 18.2305 | 1.2  | 0.5291 | 1.4  | 0.0700 | 0.8  | 0.55 | 435.9 | 3.3  | 431.2 | 4.9  | 406.2 | 26.2  | 435.9 | 3.3  | 107 |
| CH-4D1-75 | 224  | 31298  | 1.1 | 18.3914 | 2.8  | 0.5293 | 3.0  | 0.0706 | 1.0  | 0.33 | 439.8 | 4.2  | 431.4 | 10.4 | 386.5 | 62.9  | 439.8 | 4.2  | 114 |
| CH-4D1-8  | 45   | 7585   | 1.5 | 17.9798 | 22.2 | 0.5582 | 22.3 | 0.0728 | 2.1  | 0.09 | 452.9 | 9.1  | 450.4 | 81.4 | 437.1 | 500.2 | 452.9 | 9.1  | 104 |
| CH-4D1-77 | 283  | 56058  | 4.7 | 18.4428 | 2.0  | 0.5568 | 2.9  | 0.0745 | 2.1  | 0.73 | 463.1 | 9.4  | 449.5 | 10.5 | 380.3 | 44.6  | 463.1 | 9.4  | 122 |
| CH-4D1-67 | 239  | 28947  | 1.5 | 17.0714 | 3.7  | 0.6167 | 5.6  | 0.0764 | 4.3  | 0.76 | 474.3 | 19.5 | 487.8 | 21.8 | 551.4 | 80.5  | 474.3 | 19.5 | 86  |
| CH-4D1-79 | 213  | 18367  | 1.5 | 17.0936 | 5.4  | 0.6276 | 5.5  | 0.0778 | 1.1  | 0.21 | 483.0 | 5.3  | 494.6 | 21.5 | 548.6 | 117.1 | 483.0 | 5.3  | 88  |
| CH-4D1-66 | 214  | 33814  | 2.8 | 17.8718 | 4.0  | 0.6018 | 4.3  | 0.0780 | 1.6  | 0.37 | 484.2 | 7.5  | 478.4 | 16.4 | 450.5 | 88.5  | 484.2 | 7.5  | 107 |
| CH-4D1-31 | 457  | 10810  | 1.8 | 17.0641 | 2.6  | 0.6372 | 3.2  | 0.0789 | 1.9  | 0.59 | 489.3 | 8.9  | 500.6 | 12.8 | 552.4 | 57.1  | 489.3 | 8.9  | 89  |
| CH-4D1-25 | 125  | 28390  | 1.4 | 17.9824 | 4.9  | 0.6105 | 5.0  | 0.0796 | 0.9  | 0.18 | 493.8 | 4.3  | 483.8 | 19.3 | 436.8 | 109.8 | 493.8 | 4.3  | 113 |
| CH-4D1-74 | 129  | 28974  | 2.3 | 17.0094 | 6.6  | 0.6479 | 6.7  | 0.0799 | 1.4  | 0.20 | 495.7 | 6.5  | 507.2 | 26.8 | 559.4 | 143.6 | 495.7 | 6.5  | 89  |
| CH-4D1-86 | 195  | 27895  | 1.9 | 17.7405 | 6.9  | 0.6216 | 7.0  | 0.0800 | 1.3  | 0.19 | 496.0 | 6.4  | 490.8 | 27.4 | 466.9 | 153.1 | 496.0 | 6.4  | 106 |
| CH-4D1-37 | 463  | 40816  | 2.0 | 17.5174 | 2.1  | 0.6313 | 3.3  | 0.0802 | 2.6  | 0.78 | 497.3 | 12.4 | 496.9 | 13.0 | 494.8 | 45.4  | 497.3 | 12.4 | 101 |
| CH-4D1-14 | 149  | 15332  | 1.2 | 16.5749 | 4.8  | 0.6678 | 6.2  | 0.0803 | 3.9  | 0.62 | 497.8 | 18.5 | 519.4 | 25.1 | 615.5 | 104.1 | 497.8 | 18.5 | 81  |
| CH-4D1-43 | 215  | 40566  | 1.4 | 17.7130 | 5.2  | 0.6263 | 5.3  | 0.0805 | 1.0  | 0.18 | 498.9 | 4.6  | 493.8 | 20.6 | 470.3 | 114.9 | 498.9 | 4.6  | 106 |
| CH-4D1-49 | 235  | 11254  | 1.3 | 16.8646 | 3.0  | 0.6584 | 3.4  | 0.0805 | 1.6  | 0.48 | 499.3 | 7.9  | 513.6 | 13.9 | 578.0 | 65.5  | 499.3 | 7.9  | 86  |
| CH-4D1-61 | 248  | 40268  | 2.0 | 17.9033 | 2.7  | 0.6208 | 2.9  | 0.0806 | 1.1  | 0.40 | 499.7 | 5.5  | 490.3 | 11.2 | 446.6 | 58.9  | 499.7 | 5.5  | 112 |
| CH-4D1-3  | 157  | 30803  | 1.5 | 17.6426 | 5.2  | 0.6300 | 6.0  | 0.0806 | 3.1  | 0.51 | 499.8 | 14.7 | 496.1 | 23.6 | 479.1 | 114.3 | 499.8 | 14.7 | 104 |
| CH-4D1-28 | 191  | 38697  | 2.1 | 17.5471 | 3.5  | 0.6402 | 4.3  | 0.0815 | 2.4  | 0.56 | 504.9 | 11.6 | 502.4 | 16.9 | 491.1 | 77.7  | 504.9 | 11.6 | 103 |
| CH-4D1-92 | 176  | 39231  | 1.3 | 17.4160 | 4.0  | 0.6462 | 4.0  | 0.0816 | 0.4  | 0.11 | 505.8 | 2.2  | 506.1 | 16.0 | 507.7 | 87.7  | 505.8 | 2.2  | 100 |
| CH-4D1-40 | 230  | 25427  | 1.3 | 17.2579 | 4.7  | 0.6640 | 4.8  | 0.0831 | 0.7  | 0.14 | 514.6 | 3.3  | 517.0 | 19.3 | 527.7 | 103.6 | 514.6 | 3.3  | 98  |
| CH-4D1-76 | 454  | 103626 | 2.5 | 17.5914 | 1.8  | 0.6535 | 2.3  | 0.0834 | 1.4  | 0.60 | 516.2 | 6.9  | 510.6 | 9.2  | 485.6 | 40.6  | 516.2 | 6.9  | 106 |
| CH-4D1-62 | 511  | 107432 | 1.5 | 17.4392 | 1.8  | 0.6599 | 2.2  | 0.0835 | 1.3  | 0.60 | 516.8 | 6.6  | 514.6 | 8.9  | 504.7 | 38.7  | 516.8 | 6.6  | 102 |
| CH-4D1-77 | 249  | 45736  | 1.7 | 17.0557 | 4.2  | 0.6757 | 4.5  | 0.0836 | 1.5  | 0.33 | 517.5 | 7.4  | 524.2 | 18.3 | 553.4 | 92.3  | 517.5 | 7.4  | 94  |
| CH-4D1-36 | 779  | 108953 | 1.8 | 17.4597 | 1.0  | 0.6632 | 1.5  | 0.0840 | 1.2  | 0.77 | 519.8 | 5.9  | 516.6 | 6.2  | 502.1 | 21.5  | 519.8 | 5.9  | 104 |
| CH-4D1-80 | 1100 | 109077 | 2.3 | 17.4567 | 0.5  | 0.6636 | 1.8  | 0.0840 | 1.7  | 0.95 | 520.1 | 8.5  | 516.8 | 7.2  | 502.5 | 11.7  | 520.1 | 8.5  | 103 |
| CH-4D1-2  | 225  | 29021  | 1.2 | 16.7959 | 4.6  | 0.6920 | 4.8  | 0.0843 | 1.5  | 0.32 | 521.7 | 7.7  | 534.0 | 20.0 | 586.9 | 99.4  | 521.7 | 7.7  | 89  |
| CH-4D1-96 | 526  | 7111   | 1.0 | 14.6836 | 19.0 | 0.7928 | 19.1 | 0.0844 | 1.5  | 0.08 | 522.5 | 7.6  | 592.8 | 85.9 | 871.7 | 397.7 | 522.5 | 7.6  | 60  |
| CH-4D1-71 | 760  | 137516 | 3.7 | 17.4924 | 0.8  | 0.6656 | 1.0  | 0.0844 | 0.6  | 0.58 | 522.6 | 3.0  | 518.0 | 4.2  | 498.0 | 18.5  | 522.6 | 3.0  | 105 |
| CH-4D1-15 | 172  | 28377  | 3.6 | 16.9373 | 2.2  | 0.7003 | 4.7  | 0.0860 | 4.1  | 0.88 | 532.0 | 21.1 | 539.0 | 19.6 | 568.6 | 48.9  | 532.0 | 21.1 | 94  |
| CH-4D1-39 | 313  | 29709  | 1.1 | 17.0737 | 1.1  | 0.6951 | 1.4  | 0.0861 | 0.8  | 0.58 | 532.2 | 4.1  | 535.8 | 5.8  | 551.2 | 24.6  | 532.2 | 4.1  | 97  |
| CH-4D1-97 | 396  | 61528  | 1.9 | 17.4988 | 2.1  | 0.6829 | 2.5  | 0.0867 | 1.5  | 0.58 | 535.8 | 7.5  | 528.5 | 10.4 | 497.2 | 45.3  | 535.8 | 7.5  | 108 |
| CH-4D1-87 | 322  | 44225  | 2.5 | 17.3683 | 1.6  | 0.6910 | 2.1  | 0.0870 | 1.3  | 0.62 | 538.0 | 6.6  | 533.4 | 8.6  | 513.7 | 35.4  | 538.0 | 6.6  |     |

| DR Table 1. U-Pb geochronologic analyses and plots. |       |       |      |        |     |        |                |        |     |       |        |      |                    |      |        |      |          |      |      |
|-----------------------------------------------------|-------|-------|------|--------|-----|--------|----------------|--------|-----|-------|--------|------|--------------------|------|--------|------|----------|------|------|
|                                                     |       |       |      |        |     |        | Isotope ratios |        |     |       |        |      | Apparent ages (Ma) |      |        |      |          |      |      |
|                                                     |       |       |      |        |     |        |                |        |     |       |        |      |                    |      |        |      |          |      |      |
| Analysis                                            | U     | 206Pb | U/Th | 206Pb* | ±   | 207Pb* | ±              | 206Pb* | ±   | error | 206Pb* | ±    | 207Pb*             | ±    | 206Pb* | ±    | Best age | ±    | Conc |
|                                                     | (ppm) | 204Pb |      | 207Pb* | (%) | 235U*  | (%)            | 238U   | (%) | corr. | 238U*  | (Ma) | 235U               | (Ma) | 207Pb* | (Ma) | (Ma)     | (Ma) | %    |
|                                                     |       |       |      |        |     |        |                |        |     |       |        |      |                    |      |        |      |          |      |      |

|            |     |        |      |         |      |         |       |        |       |      |        |       |        |       |        |       |        |       |     |
|------------|-----|--------|------|---------|------|---------|-------|--------|-------|------|--------|-------|--------|-------|--------|-------|--------|-------|-----|
| CH-4D1-47  | 352 | 32225  | 2.6  | 15.1494 | 0.7  | 1.2815  | 1.3   | 0.1408 | 1.1   | 0.85 | 849.2  | 8.8   | 837.5  | 7.4   | 806.7  | 14.5  | 849.2  | 8.8   | 105 |
| CH-4D1-78  | 191 | 61954  | 2.8  | 15.0333 | 1.2  | 1.3303  | 1.9   | 0.1450 | 1.5   | 0.79 | 873.1  | 12.0  | 859.0  | 10.8  | 822.8  | 24.0  | 873.1  | 12.0  | 106 |
| CH-4D1-99  | 182 | 73435  | 1.6  | 14.7726 | 2.0  | 1.3652  | 2.4   | 0.1463 | 1.4   | 0.57 | 880.0  | 11.4  | 874.1  | 14.3  | 859.2  | 41.6  | 880.0  | 11.4  | 102 |
| CH-4D1-58  | 80  | 30814  | 3.0  | 14.3580 | 3.9  | 1.4438  | 4.2   | 0.1503 | 1.5   | 0.36 | 902.9  | 12.7  | 907.3  | 25.3  | 918.0  | 81.2  | 918.0  | 81.2  | 98  |
| CH-4D1-73  | 74  | 25715  | 1.3  | 14.8477 | 4.5  | 1.4039  | 4.7   | 0.1512 | 1.3   | 0.28 | 907.6  | 11.3  | 890.6  | 27.8  | 848.6  | 93.5  | 907.6  | 11.3  | 107 |
| CH-4D1-72  | 82  | 25699  | 1.8  | 14.9620 | 5.7  | 1.3949  | 5.7   | 0.1514 | 0.5   | 0.08 | 908.7  | 4.0   | 886.8  | 33.8  | 832.6  | 118.9 | 908.7  | 4.0   | 109 |
| CH-4D1-24  | 416 | 19318  | 19.8 | 13.5308 | 2.2  | 1.5588  | 2.4   | 0.1530 | 0.8   | 0.32 | 917.6  | 6.5   | 954.0  | 14.7  | 1038.9 | 45.4  | 1038.9 | 45.4  | 88  |
| CH-4D1-100 | 50  | 19636  | 2.5  | 14.3730 | 4.0  | 1.4747  | 4.0   | 0.1537 | 0.8   | 0.19 | 921.8  | 6.5   | 920.1  | 24.5  | 915.8  | 81.8  | 915.8  | 81.8  | 101 |
| CH-4D1-60  | 156 | 31140  | 1.5  | 14.0056 | 1.5  | 1.6265  | 6.4   | 0.1652 | 6.2   | 0.97 | 985.7  | 56.9  | 980.5  | 40.2  | 968.9  | 29.8  | 968.9  | 29.8  | 102 |
| CH-4D1-55  | 643 | 21033  | 2.5  | 13.9531 | 2.4  | 1.6359  | 3.0   | 0.1655 | 1.9   | 0.62 | 987.5  | 17.0  | 984.1  | 19.0  | 976.6  | 48.1  | 976.6  | 48.1  | 101 |
| CH-4D1-13  | 676 | 3436   | 6.4  | 9.5083  | 6.9  | 2.7504  | 7.9   | 0.1897 | 3.8   | 0.48 | 1119.6 | 39.4  | 1342.2 | 59.1  | 1717.3 | 127.6 | 1717.3 | 127.6 | 65  |
| CH-4D1-29  | 366 | 42944  | 0.9  | 11.5919 | 0.8  | 2.5978  | 2.0   | 0.2184 | 1.8   | 0.91 | 1273.4 | 21.0  | 1300.0 | 14.7  | 1344.2 | 16.4  | 1344.2 | 16.4  | 95  |
| CH-4D1-51  | 95  | 78078  | 1.0  | 12.7118 | 1.8  | 2.3795  | 2.5   | 0.2194 | 1.7   | 0.69 | 1278.6 | 20.2  | 1236.5 | 18.0  | 1163.7 | 36.0  | 1163.7 | 36.0  | 110 |
| CH-4D1-50  | 307 | 188159 | 0.4  | 10.5677 | 1.0  | 3.2943  | 3.5   | 0.2525 | 3.3   | 0.96 | 1451.3 | 43.1  | 1479.7 | 27.0  | 1520.7 | 18.9  | 1520.7 | 18.9  | 95  |
| CH-4D1-82  | 642 | 138825 | 0.5  | 9.3847  | 0.4  | 4.3631  | 2.9   | 0.2970 | 2.9   | 0.99 | 1676.3 | 42.8  | 1705.4 | 24.1  | 1741.3 | 6.8   | 1741.3 | 6.8   | 96  |
| CH-4D1-53  | 41  | 17700  | 1.3  | 8.1608  | 1.5  | 5.8946  | 2.5   | 0.3489 | 2.0   | 0.80 | 1929.3 | 33.3  | 1960.4 | 21.8  | 1993.5 | 26.9  | 1993.5 | 26.9  | 97  |
| CH-4D1-81  | 345 | 101494 | 2.5  | 4.7124  | 4.2  | 12.6256 | 5.7   | 0.4315 | 3.8   | 0.66 | 2312.5 | 72.9  | 2652.1 | 53.4  | 2922.5 | 68.8  | 2922.5 | 68.8  | 79  |
|            |     |        |      |         |      |         |       |        |       |      |        |       |        |       |        |       |        |       |     |
| Ch-4D2-51  | 250 | 1957   | 2.0  | 9.6361  | 35.4 | 0.5148  | 203.8 | 0.0360 | 200.7 | 0.98 | 227.8  | 450.0 | 421.7  | 866.0 | 1692.7 | 675.8 | 1692.7 | 675.8 | 13  |
| Ch-4D2-20  | 157 | 10234  | 2.5  | 15.0661 | 18.6 | 0.5469  | 19.3  | 0.0598 | 5.0   | 0.26 | 374.2  | 18.0  | 443.0  | 69.2  | 818.2  | 391.8 | 374.2  | 18.0  | 46  |
| Ch-4D2-98  | 136 | 80809  | 1.8  | 17.7435 | 5.1  | 0.4650  | 6.1   | 0.0598 | 3.3   | 0.55 | 374.6  | 12.2  | 387.7  | 19.6  | 466.5  | 112.7 | 374.6  | 12.2  | 80  |
| Ch-4D2-92  | 75  | 29940  | 2.7  | 20.0571 | 19.1 | 0.4142  | 19.4  | 0.0603 | 3.1   | 0.16 | 377.2  | 11.3  | 351.9  | 57.7  | 188.3  | 448.8 | 377.2  | 11.3  | 200 |
| Ch-4D2-82  | 455 | 150784 | 2.8  | 18.0620 | 2.1  | 0.4656  | 2.5   | 0.0610 | 1.4   | 0.55 | 381.7  | 5.1   | 388.1  | 8.1   | 427.0  | 47.1  | 381.7  | 5.1   | 89  |
| Ch-4D2-79  | 128 | 51855  | 1.3  | 19.0014 | 6.1  | 0.4454  | 7.1   | 0.0614 | 3.7   | 0.52 | 384.1  | 13.8  | 374.1  | 22.2  | 312.8  | 137.9 | 384.1  | 13.8  | 123 |
| Ch-4D2-44  | 236 | 81471  | 2.1  | 17.5626 | 3.1  | 0.4831  | 3.3   | 0.0615 | 1.2   | 0.37 | 385.0  | 4.6   | 400.2  | 10.9  | 489.2  | 67.5  | 385.0  | 4.6   | 79  |
| Ch-4D2-72  | 127 | 81843  | 2.2  | 18.6585 | 4.9  | 0.4576  | 6.3   | 0.0619 | 3.9   | 0.62 | 387.3  | 14.6  | 382.6  | 20.0  | 354.1  | 111.4 | 387.3  | 14.6  | 109 |
| Ch-4D2-91  | 36  | 14817  | 1.9  | 19.2720 | 15.0 | 0.4442  | 15.6  | 0.0621 | 4.2   | 0.27 | 388.3  | 15.9  | 373.2  | 48.8  | 280.5  | 345.7 | 388.3  | 15.9  | 138 |
| Ch-4D2-81  | 321 | 152317 | 3.8  | 18.1843 | 4.1  | 0.4713  | 5.2   | 0.0622 | 3.1   | 0.61 | 388.7  | 11.8  | 392.1  | 16.8  | 411.9  | 91.7  | 388.7  | 11.8  | 94  |
| Ch-4D2-61  | 259 | 109475 | 0.9  | 18.0520 | 6.0  | 0.4748  | 6.1   | 0.0622 | 1.3   | 0.21 | 388.8  | 4.9   | 394.5  | 20.0  | 428.2  | 133.1 | 388.8  | 4.9   | 91  |
| Ch-4D2-16  | 237 | 86997  | 1.3  | 17.6493 | 2.9  | 0.4857  | 4.7   | 0.0622 | 3.8   | 0.80 | 388.8  | 14.3  | 402.0  | 15.7  | 478.3  | 63.2  | 388.8  | 14.3  | 81  |
| Ch-4D2-63  | 72  | 31981  | 1.1  | 19.6260 | 11.0 | 0.4390  | 11.1  | 0.0625 | 1.1   | 0.10 | 390.8  | 4.3   | 369.6  | 34.3  | 238.7  | 254.8 | 390.8  | 4.3   | 164 |
| Ch-4D2-2   | 243 | 70305  | 2.0  | 17.6087 | 3.3  | 0.4900  | 3.7   | 0.0626 | 1.6   | 0.44 | 391.3  | 6.2   | 404.9  | 12.4  | 483.4  | 73.8  | 391.3  | 6.2   | 81  |
| Ch-4D2-90  | 132 | 23435  | 1.4  | 16.9073 | 11.4 | 0.5127  | 11.6  | 0.0629 | 2.2   | 0.19 | 393.1  | 8.3   | 420.3  | 39.8  | 572.5  | 247.8 | 393.1  | 8.3   | 69  |
| Ch-4D2-1   | 44  | 19603  | 2.3  | 19.4768 | 24.8 | 0.4468  | 24.8  | 0.0631 | 1.7   | 0.07 | 394.5  | 6.5   | 375.0  | 77.9  | 256.2  | 576.7 | 394.5  | 6.5   | 154 |
| Ch-4D2-93  | 179 | 99151  | 1.9  | 17.7152 | 3.3  | 0.4914  | 3.7   | 0.0631 | 1.7   | 0.45 | 394.7  | 6.5   | 405.9  | 12.5  | 470.0  | 74.0  | 394.7  | 6.5   | 84  |
| Ch-4D2-14  | 247 | 29466  | 1.8  | 16.8507 | 5.4  | 0.5174  | 5.8   | 0.0632 | 2.1   | 0.36 | 395.2  | 8.1   | 423.4  | 20.0  | 579.8  | 117.0 | 395.2  | 8.1   | 68  |
| Ch-4D2-80  | 94  | 37786  | 2.7  | 18.8863 | 13.0 | 0.4619  | 13.1  | 0.0633 | 1.2   | 0.09 | 395.5  | 4.7   | 385.6  | 42.0  | 326.6  | 296.6 | 395.5  | 4.7   | 121 |
| Ch-4D2-55  | 208 | 45334  | 2.4  | 17.3690 | 5.5  | 0.5023  | 5.6   | 0.0633 | 0.8   | 0.14 | 395.5  | 3.0   | 413.3  | 19.0  | 513.6  | 122.0 | 395.5  | 3.0   | 77  |
| Ch-4D2-41  | 150 | 75002  | 1.7  | 17.1313 | 6.5  | 0.5095  | 7.1   | 0.0633 | 2.9   | 0.41 | 395.7  | 11.1  | 418.1  | 24.5  | 543.8  | 142.8 | 395.7  | 11.1  | 73  |
| Ch-4D2-84  | 131 | 49912  | 1.8  | 18.3313 | 6.9  | 0.4762  | 7     |        |       |      |        |       |        |       |        |       |        |       |     |





|                                                     |       |       |      |        |     |                |     |        |     |       |        |                    |        |      |        |      |          |      |      |
|-----------------------------------------------------|-------|-------|------|--------|-----|----------------|-----|--------|-----|-------|--------|--------------------|--------|------|--------|------|----------|------|------|
| DR Table 1. U-Pb geochronologic analyses and plots. |       |       |      |        |     |                |     |        |     |       |        |                    |        |      |        |      |          |      |      |
|                                                     |       |       |      |        |     | Isotope ratios |     |        |     |       |        | Apparent ages (Ma) |        |      |        |      |          |      |      |
|                                                     |       |       |      |        |     |                |     |        |     |       |        |                    |        |      |        |      |          |      |      |
| Analysis                                            | U     | 206Pb | U/Th | 206Pb* | ±   | 207Pb*         | ±   | 206Pb* | ±   | error | 206Pb* | ±                  | 207Pb* | ±    | 206Pb* | ±    | Best age | ±    | Conc |
|                                                     | (ppm) | 204Pb |      | 207Pb* | (%) | 235U*          | (%) | 238U   | (%) | corr. | 238U*  | (Ma)               | 235U   | (Ma) | 207Pb* | (Ma) | (Ma)     | (Ma) | %    |
|                                                     |       |       |      |        |     |                |     |        |     |       |        |                    |        |      |        |      |          |      |      |

All uncertainties are reported at the 1-sigma level, and include only internal (measurement) errors.

External (systematic) errors are as follows:

|           |                                                          |
|-----------|----------------------------------------------------------|
| SJS6-106: | 206Pb/238U = 1.5%, 206Pb/207Pb = 0.9% (at 2-sigma level) |
| SJS6-114: | 206Pb/238U = 1.2%, 206Pb/207Pb = 0.9% (at 2-sigma level) |
| TSA-138:  | 206Pb/238U = 2.1%, 206Pb/207Pb = 0.9% (at 2-sigma level) |
| Ch4d1:    | 206Pb/238U = 1.6%, 206Pb/207Pb = 0.9% (at 2-sigma level) |
| Ch4d2:    | 206Pb/238U = 2.6%, 206Pb/207Pb = 1.0% (at 2-sigma level) |

Crystals of R33 were analyzed from each mount along with unknowns, and analyzed as secondary standards.

|  |                                                                             |
|--|-----------------------------------------------------------------------------|
|  | Individual analyses shown above.                                            |
|  | Weighted mean age is calculated for each mount, and for all analyses above. |
|  | Known age (from ID-TIMS is 419.3 ± 0.4 Ma (Black et al. (2004).             |

U concentration and U/Th are calibrated relative to Sri Lanka zircon and are accurate to ~20%.

Common Pb correction is from 204Pb, with composition interpreted from Stacey and Kramers (1975).

Uncertainties of 1.5 for 206Pb/204Pb, 0.3 for 207Pb/ 204Pb, and 2.0 for 208Pb/ 204Pb are applied to common Pb composition.

U/Pb and 206Pb/207Pb fractionation is calibrated relative to fragments of a large Sri Lanka zircon of 563.5 ± 3.2 Ma (2-sigma, from Gehrels et al., 2008).

U decay constants and composition as follows: 238U = 9.8485 x 10-10, 235U = 1.55125 x 10-10, 238U/235U = 137.88

Analytical methods as described by Gehrels et al. (2008).

Concordia and age-probability plots made with Isoplot (Ludwig, 2008).

Black, L., Kamo, S., Allen, C., Davis, D., Aleinikoff, J., Valley, J., Mundil, R., Campbell, I., Korsch, R., Williams, I., and Foudoulis, C., 2004, Improved 206Pb/238U microprobe geochronology by the monitoring of a trace-element-related matrix effect; SHRIMP, ID-TIMS, ELA-ICP-MS, and oxygen isotope documentation for a series of zircon standards: Chemical Geology, v. 205, p. 115-140.

Gehrels, G.E., Valencia, V., Ruiz, J., 2008, Enhanced precision, accuracy, efficiency, and spatial resolution of U-Pb ages by laser ablation-multicollector-inductively coupled plasma-mass spectrometry: Geochemistry, Geophysics, Geosystems, v. 9, Q03017, doi:10.1029/2007GC001805.

Ludwig, K.R., 2008, Isoplot 3.6: Berkeley Geochronology Center Special Publication No. 4, 77 p.

Stacey, J.S., and Kramers, J.D., 1975, Approximation of terrestrial lead isotope evolution by a two stage model: Earth and Planetary Science Letters, v. 26, p. 207-221.
